# Supplementary material for: Place4Carers: a mixed-method study protocol for engaging family caregivers in meaningful actions for successful ageing in place
Source: PubMed Central journal article supplement — BMJ Open. 2020 Aug 11;10(8):e037570. doi: 10.1136/bmjopen-2020-037570 (PMC7422654; doi:10.1136/bmjopen-2020-037570), 2020-08-11
Supplement: bmjopen-2020-037570.draft_revisions.pdf [file bmjopen-2020-037570.draft_revisions.pdf]

# BMJ Open

BMJ Open is committed to open peer review. As part of this commitment we make the peer review history of every article we publish publicly available.

When an article is published we post the peer reviewers' comments and the authors' responses online. We also post the versions of the paper that were used during peer review. These are the versions that the peer review comments apply to.

The versions of the paper that follow are the versions that were submitted during the peer review process. They are not the versions of record or the final published versions. They should not be cited or distributed as the published version of this manuscript.

BMJ Open is an open access journal and the full, final, typeset and author-corrected version of record of the manuscript is available on our site with no access controls, subscription charges or pay-per-view fees (<http://bmjopen.bmj.com>).

If you have any questions on BMJ Open's open peer review process please email [info.bmjopen@bmj.com](mailto:info.bmjopen@bmj.com)

# BMJ Open

## A MIXED-METHOD STUDY PROTOCOL FOR ENGAGING FAMILY CAREGIVERS IN MEANINGFUL ACTIONS FOR SUCCESSFUL AGEING IN PLACE

|                               |                                                                                                                                                                                                                                                                                                                                                                                                                                                                                                                                                                                                                                                                                                                                                                                                                                                                                                                                                               |
|-------------------------------|---------------------------------------------------------------------------------------------------------------------------------------------------------------------------------------------------------------------------------------------------------------------------------------------------------------------------------------------------------------------------------------------------------------------------------------------------------------------------------------------------------------------------------------------------------------------------------------------------------------------------------------------------------------------------------------------------------------------------------------------------------------------------------------------------------------------------------------------------------------------------------------------------------------------------------------------------------------|
| Journal:                      | <i>BMJ Open</i>                                                                                                                                                                                                                                                                                                                                                                                                                                                                                                                                                                                                                                                                                                                                                                                                                                                                                                                                               |
| Manuscript ID                 | bmjopen-2020-037570                                                                                                                                                                                                                                                                                                                                                                                                                                                                                                                                                                                                                                                                                                                                                                                                                                                                                                                                           |
| Article Type:                 | Protocol                                                                                                                                                                                                                                                                                                                                                                                                                                                                                                                                                                                                                                                                                                                                                                                                                                                                                                                                                      |
| Date Submitted by the Author: | 11-Feb-2020                                                                                                                                                                                                                                                                                                                                                                                                                                                                                                                                                                                                                                                                                                                                                                                                                                                                                                                                                   |
| Complete List of Authors:     | <p>GRAFFIGNA, GUENDALINA; UNIVERSITA' CATTOLICA DEL SACRO CUORE, PSYCHOLOGY<br/> Barello, Serena; Università Cattolica , Department of Psychology<br/> Morelli, Niccolò; UNIVERSITA' CATTOLICA DEL SACRO CUORE, PSYCHOLOGY; Università di Bologna, Department of Sociology and Business Law<br/> Gheduzzi, Eleonora; Politecnico di Milano, Department of Management Engineering<br/> Corbo, Massimo; Casa Cura Policlinico (CCP), Department of Neurorehabilitation Sciences<br/> Ginex, Valeria; Casa Cura Policlinico (CCP), Department of Neurorehabilitation Sciences; Fondazione NEED Institute<br/> Lascioli, Andrea; Azienda Territoriale per i Servizi alla Persona Vallecamonica<br/> Ferrari, Roberta; Azienda Territoriale per i Servizi alla Persona Vallecamonica<br/> Feriti, Carolina; Azienda Territoriale per i Servizi alla Persona Vallecamonica<br/> Masella, Cristina ; Politecnico di Milano, Department of Management Engineering</p> |
| Keywords:                     | <p>Organisation of health services &lt; HEALTH SERVICES ADMINISTRATION &amp; MANAGEMENT, QUALITATIVE RESEARCH, HEALTH SERVICES ADMINISTRATION &amp; MANAGEMENT</p>                                                                                                                                                                                                                                                                                                                                                                                                                                                                                                                                                                                                                                                                                                                                                                                            |
|                               |                                                                                                                                                                                                                                                                                                                                                                                                                                                                                                                                                                                                                                                                                                                                                                                                                                                                                                                                                               |

SCHOLARONE™  
Manuscripts

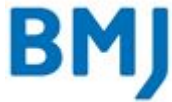

I, the Submitting Author has the right to grant and does grant on behalf of all authors of the Work (as defined in the below author licence), an exclusive licence and/or a non-exclusive licence for contributions from authors who are: i) UK Crown employees; ii) where BMJ has agreed a CC-BY licence shall apply, and/or iii) in accordance with the terms applicable for US Federal Government officers or employees acting as part of their official duties; on a worldwide, perpetual, irrevocable, royalty-free basis to BMJ Publishing Group Ltd ("BMJ") its licensees and where the relevant Journal is co-owned by BMJ to the co-owners of the Journal, to publish the Work in this journal and any other BMJ products and to exploit all rights, as set out in our [licence](#).

The Submitting Author accepts and understands that any supply made under these terms is made by BMJ to the Submitting Author unless you are acting as an employee on behalf of your employer or a postgraduate student of an affiliated institution which is paying any applicable article publishing charge ("APC") for Open Access articles. Where the Submitting Author wishes to make the Work available on an Open Access basis (and intends to pay the relevant APC), the terms of reuse of such Open Access shall be governed by a Creative Commons licence – details of these licences and which [Creative Commons](#) licence will apply to this Work are set out in our licence referred to above.

Other than as permitted in any relevant BMJ Author's Self Archiving Policies, I confirm this Work has not been accepted for publication elsewhere, is not being considered for publication elsewhere and does not duplicate material already published. I confirm all authors consent to publication of this Work and authorise the granting of this licence.

**PLACE4CARERS:****A MIXED-METHOD STUDY PROTOCOL FOR ENGAGING FAMILY CAREGIVERS IN  
MEANINGFUL ACTIONS FOR SUCCESSFUL AGEING IN PLACE**

Guendalina Graffigna<sup>1</sup>, Serena Barello<sup>1</sup>, Niccolò Morelli<sup>1,2</sup>, Eleonora Gheduzzi<sup>3</sup>, Massimo Corbo<sup>4</sup>, Valeria Ginex<sup>4,5</sup>, Roberta Ferrari<sup>6</sup>, Andrea Lascioli<sup>6</sup>, Carolina Feriti<sup>6</sup>, Cristina Masella<sup>3</sup>

1. Department of Psychology, EngageMinds HUB Research Center, Università Cattolica del Sacro Cuore di Milano, Italy.
2. Department of Sociology and Business Law, Università di Bologna, Italy
3. Department of Management Engineering, Politecnico di Milano, Italy
4. Department of Neurorehabilitation Sciences, Casa Cura Policlinico (CCP), Milano, Italy
5. Fondazione NEED Institute, Milano, Italy
6. Azienda Territoriale per i Servizi alla Persona Vallecamonica, Breno, Italy

**Corresponding author at:**

Serena Barello, PhD, PsyD  
Assistant Professor  
EngageMinds Hub – Consumer, Food & Health Research Center  
Department of Psychology  
Università Cattolica del Sacro Cuore, L.go Agostino Gemelli 1, 20143, Milano (Italy)  
Mail: serena.barello@unicatt.it  
Phone : +39 02.7234.3863

## Abstract

**Introduction.** Engaging family caregivers in the care network could be a critical asset to make the “ageing-in-place” imperative a reality. This is particularly evident in remote and rural areas, where family caregivers can fill the gaps that exist due to the fragmentation of the social and welfare system. However there is little knowledge about family caregivers of elderly citizens expectations towards health and care services and scarce attentions has been devoted to their perspectives particularly in rural and remote areas. Place4Carers (P4C) project aims to co-design an innovative, context-based, organizational model of social and care services for family caregivers of elderly citizens living in the mountain area of Vallecamonica (Italy). This innovative service model should be a way to guarantee ageing-in-place processes.

**Methods and analysis.** Place4Carers is a community-based participatory research project that features 7 work packages. WP1 consisted of an extensive survey on unmet of the population of family caregivers receiving services in Vallecamonica. WP2 consisted of a scoping literature review on existing interventions to engage family caregivers living in remote areas. Additional focus groups were aimed to co-generate ideas for shaping caregiver oriented services and organizational models. WP3 will be aimed to co-create new ideas about the objectives, features and characteristics of a new service able to address the caregiver needs and expectations emerged in the previous modules of the research. WP4 is dedicated to the testing of the service ideas co-created in WP3 through a piloting intervention. Finally, WP5 will assess the transferability of the intervention to other similar contexts.

**Ethics and dissemination.** The study has been approved by the Ethics Committees of the Department of Psychology of Università Cattolica del Sacro Cuore (Milan) and Politecnico of Milan. Results will be disseminated through peer reviewed journals, scientific meetings and direct presentation to the general population.

**Keywords:** Caregiver engagement; Community Based Participatory Research; service co-creation; ageing-in-place

### Strengths and limitation of this study

- ▶ This study aims to ideate, co-plan and implement a new - better accessible and sustainable - service targeted to family caregivers of elderly citizens on the basis of the participative cooperation among family caregivers, elderly citizens, researchers and welfare system representatives.
- ▶ This study will represent the first research to enhance and sustain the role of family caregivers in making the ageing in place a sustainable reality in remote and rural areas;
- ▶ It uses a Community Based Participatory Research approach to engage all the actors involved in the care of elderlies
- ▶ It is a multi-stakeholder, multi-level and self-sustained project, which will have both short-term and long-term beneficial effects
- ▶ The study is conducted in a specific territory and the results should be tested in other contexts to enhance their validity.

## INTRODUCTION

### Rationale of the study

This study's rationale is based on the insight that successful ageing is today a complex phenomenon that is strictly intertwined with the "places" and spaces that people belong to [1]. According to this vision, "space" is not static or a simple 'background' to events, but is very much a part of social relationship [2]. Moreover, spaces are not only physical but also have social, psychological and symbolic meanings. People may have quite different lived experiences, expectations and opinions related to a particular space. None of these aspects of space (social, physical and symbolic) is necessarily more 'real' or important than any other. Instead, they are interconnected and directly dependent on each other [3]. In covering these key points that shape the rationale of this study, in the next paragraph, a more detailed description of the theoretical lenses adopted in this project is provided.

### *Ageing: the need for a multidimensional and multidirectional approach*

Ageing is a dynamic process that lasts a lifetime, determined by internal factors such as genes, and external factors such as the physical, social and cultural spaces [4]. In past decades, the secret of longevity was primarily attributed to genetic factors, however today researchers have found that environmental factors – also in terms of life spaces - have an increasingly relevant weight in prolonging human life and, above all, the quality of life of the elderly [5,6].

By assuming a social-ecological framework of analysis [9] the Place4Carers project (P4C) will disentangle the role of spaces and of their interrelated dynamics in the ageing process. Particularly we will refer to the concept of spaces in the ageing process assuming a three-fold perspective:

1. *Ageing space as exosystem: the uniqueness of ageing in remote rural areas.* In the Italian context – similarly to other European countries - the elderly are becoming a prominent feature of the population, especially in more remote and rural areas which currently experience health inequities including limited access to health and social services [10]. Literature suggests that inequities in health access for elderly rural population are more frequent if compared with their urban counterparts, [11]. The ageing population presents a range of challenges for the health and aged care system, particularly in the remote rural areas where the workforce shortage and the lack of access to specialist services are confounding factors. It is interesting to note that "ageing in rural areas has received less attention in the literature than the proportions of older people living in rural areas might suggest" [12]. Given that much of the research on the ageing population to date has been subjected to "urban-related" bias, it is time to begin considering data on the ageing process when occurring in rural/remote areas.

Many authors have noted that the specific needs of rural and remote areas in term of health and social-related services have not been met by service provision derived from criteria from urban contexts [11,13,14]. This research focusing on older persons living on the margins, both geographically and socially, have argued that in both policy and economic debates the local experiences of older people living in rural communities have been often ignored [15]. Further research efforts are needed to fill this gap into the literature.

2. *Ageing space as mesosystem: opportunity and challenges of the "ageing-in-place" imperative.* "Ageing-in-place" is a popular term in current aging policy and is today recognized as a strategic priority for making the ageing process more sustainable for both individuals and societies. "Ageing in place" is defined as "remaining living in the community, with some level of independence, rather than in residential care" [16]. Claims that people prefer to age in place abound [1] because it is seen as enabling older people to maintain independence, autonomy, and meaningful relations in terms of connection to social support, including friends and family [17]. Having people remain in their homes and communities for as long as possible also avoids the costly option of institutional care and is therefore favored by policy makers, health providers, and by many older people themselves. The term "place" has several dimensions that are interrelated: a physical dimension that can be seen and touched like home or neighborhood, a social dimension involving relationships with people and the

ways in which individuals remain connected to others, an emotional and psychological dimension, which has to do with a sense of belonging and attachment, and a cultural dimension, which has to do with older people's values, beliefs, ethnicity, and symbolic meanings... Livable communities should offer affordable and appropriate services that a continuum of care to effectively engage elderly and their family in effective and sustainable health and social care.

Several interventions and projects both at a national and international level are today devoted to reducing the fragmentation of welfare services by putting the citizen – and his/her needs - at the centre of service delivery. However, a study conducted in Europe [19] found that a fragmented system of services was unable to meet the holistic needs of ageing societies, because integration between services is complex, including problems in inter-disciplinary teamwork, financing, and legal aspects. However, fragmentation and the need for integration between health and social services is on the agenda of many ageing countries [20]. Furthermore, in rural and remote context, welfare and social system often result fragmented and poorly accessible, this making even more difficult the ageing place paradigm, or at least risking transforming it in a necessity rather than in a choice and by abandoning elderly peoples and their family to directly deal with all the challenges implied in the ageing process.

*3. Ageing space as microsystem: the role of family relationship and caregiving for elderly citizens.* Even if the “ageing in place” approach to elderly care is promising and might have positive impact on the elderly health and social wellbeing, it might present huge challenges to families, and society as a whole, not least because many of these societies are highly family-based in respect of support for older people [16,21]. Quite simply, that family is shrinking dramatically and the role of the family is changing likewise [22]. According to the statistics, it is also a fact that informal caregivers do a significant amount of work, and research has shown that such caring places a significant burden on caregivers. Across the OECD, more than one in ten adults (family and friends) is involved in informal, typically unpaid, caregiving, defined as providing help with personal care or basic activities of daily living (ADL) to people with functional limitations [23]. The percentage of the population reporting to be informal carers across OECD countries for which data are available ranges from 8% to just over 16%. There is no clear geographic distribution in the rate of caregiving: certain southern European countries have among the highest percentages (Italy, Spain). Family caregiver engagement is indeed regarded as a key factor to improve the quality and the sustainability of care services for the elderly [25–27]. Several studies have shown that caregivers are the invisible backbone of the social and health care settings, as they facilitate the integration especially in those areas and communities with limited access to services. Despite their unquestionable role in increasing the chance of ageing-in-place for the elderly people they take care of, the caregivers experience several criticalities. In fact, caregivers attest a critical decrease on their quality of life [28], and they report health issues, such as tiredness, insomnia, depression, weight loss or gain, drug use and need for psychological support; these issues are frequently reported by women, especially if older. The European Commission report on “The indirect cost of long term care” (2013) [29] reveals that these situation of psycho-social distress is diffused also for caregivers in countries other than Italy. This is especially the case for caregivers of elderly people [29] and for those who are required to dedicate a significant amount of time and intensity of care [30]. Actually, the caregivers of elderly people often become the primary interlocutors for the health and social care services to take decisions over the patients' therapies and long-term treatments [31].

Moreover, caregivers support the compliance to treatments and therapies and they support the elderly in managing follow-ups and clinical exams [32]. Last, caregivers are often the primary sources of psychological support and empathy for the care receiver and he/she represents the social entity referral. Against this background, research shows that family caregivers who are more engaged in the care journey of their loved one have more capability to deal with stressful situations such as caregiving and thus, have less anxiety and depression and better perceived health [33–36]. By feeling more empowered and engaged in the caregiving tasks, caregivers might also reach a better work-family balance.

Appropriate engagement and tailored support of caregivers have the potential to improve their experiences and quality of life and facilitate shared decision making while enhancing the quality of care provided to older people and reducing the use of unnecessary health and social services [37], as well as increasing the effectiveness of health and social care interventions [38]. Furthermore, supporting the role of informal carers



(family and friends providing mostly unpaid care to frail seniors) is important to provide an adequate continuum of care between informal and formal care.

Figure 1 describes the threefold social-ecological framework of analysis adopted by P4C.

*[please, insert figure 1 around here]*

## **Aims**

The project aims to achieve the following objectives:

1. to explore, understand and measure the needs of education, welfare, assistance and social inclusion of caregivers of elderly citizens in general and in relation to the offer of services planned by the local home care agency in the territory of Vallecamonica;
2. to assess the cost (both economic and social) sustained by families when caring for their elderly relatives and to understand the critical aspects faced when accessing and using welfare services that are present in the territory;
3. to ideate, co-plan and implement a new - better accessible and sustainable - service targeted to family caregivers of elderly citizens on the basis of the participative cooperation among family caregivers, elderly citizens, researchers and welfare system representatives;
4. to test the transferability of the new service concept into other and similar remote rural territories of the Lombardy Region (Italy).

## **METHODS AND ANALYSIS**

### **Methodological approach**

The proposed study is designed according to a Community Based Participatory Research (CBPR) approach [39,40], in order to engage all the relevant stakeholders and to capture the different perspectives of the actors involved in the care of elderlies and welfare services. Thanks to its participatory nature, the P4C project will be not only the occasion to deepen the aging and caregiving dynamics in the specific outreach territory of Vallecamonica. It will also be a situated co-production lab, where to engage elderly citizens, their caregivers and the welfare system to generate ideas for better accessible, effective and economically sustainable welfare services targeted to family caregivers.

This approach has the value to be grounded in the needs, issues, concerns, and strategies of communities and the community-based organizations that serve them and support and/or enhancing the strategic action that leads to community transformation and social change by directly engaging target stakeholders and stakeholders' knowledge in the research process and its outcomes. This is a partnership approach to research that equitably involves community members, organizational representatives, and researchers in all the phases of the research process. In this approach, all partners contribute expertise and ownership to reach shared decisions and to make the knowledge produced best rooted in the community experience and more able to be translated into the practice of services development.

In this project, we will mainly focus on the community of Vallecamonica in order to deepen the unique experiences and needs of family caregivers caring for elderly citizens located in that geographic area. Moreover, the involvement of the local home care agency will be a key asset in this project, in order to produce knowledge well integrated with situated interventions and policies and thus better able to generate social change and to improve the health and quality of life of community members. Community members, professionals belonging to home care agency and the researchers will collaborate in all the phases of the project in order to improve its sustainability and its ability to set the ground not only for a better knowledge production process, but also for the translation of such knowledge into a real opportunity of policy, organizational and social change. Furthermore, extra local or regional expertise will be included in the project if this will result

1  
2  
3 as needed in order to improve the applicability and the depth of insight gained. We will also guarantee the  
4 continuous methodological and scientific supervision of an International Advisory Board in order to validate  
5 the research design and the tools used in the research. An important aspect of this study is to provide insight  
6 from all the stakeholders' perspective by involving them in all the phase of the research process.  
7  
8  
9

## 10 **Setting of the study**

11 The research setting is Vallecamonica that an outreach territory in Italy and local partner is ATSP the agency  
12 that provide home services to local community.  
13  
14

15 Vallecamonica is a mountainous territory in the northern part of the Lombardy Region. It is divided into 44  
16 municipalities, all of which have been categorized as "peripheral" or "ultra-peripheral", due to a poor access  
17 to services, scarce infrastructures, limited economic prosperity and negative demographic trends. Residential  
18 areas in Vallecamonica are geographically dispersed, and the viability is not made easy by the conformation  
19 of the territory and the limited network of infrastructures and public transportation services. The population  
20 living in the area is characterized by an ageing index, computed as the ratio between the number of people  
21 aged 65 or more and those aged 14 or less, equal to 157,3 (the average for the Lombardy Region is 152,6;  
22 DGR X/5208). The high proportion of elderly people attests a situation of diffused frailty, with several social  
23 and health care needs. Against this widespread need, most of the municipalities are distant 20 to 40 km (or  
24 more) from the main hospital and health care structures (DGR X/5208). Unsurprisingly, the amount of social  
25 and assistance services required and provided to support the difficult access to services increases year after  
26 year.  
27  
28  
29  
30

## 31 **Study Design**

32 The Place4Carer Research Protocol is articulated in 5 work packages (WPs), as described in the next  
33 paragraphs.  
34  
35

### 36 ***WPI – Quantitative survey to define family caregivers needs, current services usage and sustained costs***

37 *Objectives.* This research module is conceived as an extensive assessment on the entire population of family  
38 caregivers of elderly people receiving services from the ATSP in Vallecamonica aimed to:  
39

- 40 • Analyze, quantify and map experiences, unmet needs, preferences and expectations of support and  
41 assistance of family caregivers involved in elderly care, in general and in relation to the specific  
42 service offered by ATSP;
- 43 • Perform a service and costs analysis in order to map the actual use of available services by  
44 caregivers and the direct costs sustained by families for the elderly care and support;
- 45 • Identify the main target of caregiver (i.e. the more needing ones) to which address the new service  
46 and to be involved in the following participatory phases of the project.  
47  
48

49 *Tools and methods.* A quantitative survey will be designed comprehending measures of caregivers' needs,  
50 levels of engagement and questions to gather information about the direct costs sustained by the families for  
51 providing assistance to the elderly (i.e. out of pocket payments both for the services received by the ATSP and  
52 for additional assistance services). The survey will be administered by a psychologist at caregivers' house.  
53  
54

55 *Sampling.* Only family caregivers that have concrete difficulties in the daily care of their dear ones will be  
56 involved in the survey. Thus, we will focus on local service providers that offer long-term household services  
57 for elders. Selecting criteria will be: family caregivers, whose elders have been living at home for a medium  
58 to long time period assisted by two home care services that expressly will consent the interview.  
59  
60

1  
2  
3 *Data Analysis.* Survey data will be anonymized, stored in an electronic database and shared with the other  
4 partners. The data collected in the survey will be analyzed in the aim of to take a snapshot of the population  
5 of the family caregivers in the area, in terms of needs, economic burden and services required.  
6  
7

### 9 ***WP2 – Narrative analysis of the literature to map existing initiatives and services for caregiver engagement***

10 *Objective.* The aim of this module will be identifying good practices described in the literature related to  
11 supporting and engaging family caregivers of elderly people in rural/remote settings.  
12

13 *Tools and Methods.* Scoping review approach, set out by Arksey and O'Malley (2005)[47] will be preferred  
14 rather than literature review as we want to explore the conceptualization of ageing and of intervention  
15 mechanisms adopted to promote caregiver's engagement which oriented such interventions. The following  
16 research string will be adopted: [(caregivers OR family member\*) AND (ageing OR elderly\* OR old\*) OR  
17 (patient\*) AND (support OR intervention OR program OR education OR counselling) AND (rural\* OR  
18 mountain\* OR "hard to reach"\*)]. The terms caregivers and family members will be adopted in order to  
19 differentiate from professional, paid caregivers. The terms patient or older people will be included to indicate  
20 the care receiver. Moreover, we will include the terms support, intervention, program, education, counselling,  
21 in order to map a broader variety of initiatives. Finally, as our primary interest is on hard to reach areas, we  
22 will include the terms rural, mountain and hard to reach.  
23  
24

25 This scoping review will be carried throughout the following scientific databases: Scopus, Psych-Info, Cinhal,  
26 Pubmed.  
27  
28

29  
30  
31 *Data Analysis.* All articles will be merged in a unique database in order to remove duplicates. Secondly, titles  
32 and abstracts will be checked for the inclusion criteria, and in cases of ambiguity, also full texts will be read  
33 in order to be sure for the inclusion. Moreover, the reference list will be screened in order to identify additional  
34 material. To be included, articles should be published from 2012, recognized European Year of Active Aging,  
35 in English, and the full text must be accessible. Moreover, articles must focus on interventions during the  
36 planning, piloting, implementation or analysis of the results. As a consequence, all articles that reflect on the  
37 necessity to provide intervention to caregivers, without providing a service, are not included. Receivers of  
38 these interventions must be informal caregivers of family members. The care receivers, as mentioned before,  
39 should be over 60 years old. Finally, the geographical context of the provided service must be a hard to reach  
40 area, including rural or mountain area. Articles will be analyzed at two levels. (1) Intervention characteristics:  
41 objective of the intervention, characteristics of the receiver (by type of patient), context of intervention,  
42 presence or absence of technologies, individual or group setting, tools and duration of the intervention. More  
43 precisely, the retrieved studies will be organized according to their main objective (i.e. psychosocial  
44 interventions, educational interventions, organizational interventions.) following the categorization of Roter et  
45 al (1998)[48]. (2) Study characteristics: country, study design (randomized controlled trial "RCT", controlled  
46 trial "CT", cross-sectional "CS", pilot "P"), sample and number of participants, outcome measures and results.  
47  
48  
49

### 51 ***WP3 – Co-creation workshop with caregivers***

52  
53 *Objectives.* This work package of the protocol will be dedicated to co-create (together with family caregivers,  
54 service providers and researchers) new ideas about the objectives, features and characteristics of a new service  
55 able to address the caregiver needs and expectations emerged in the previous modules of the research.  
56

57 *Tools and methods.* Focus group technique is selected as it reaches our objectives of identifying caregiver  
58 needs and to co-create services for helping caregivers in their mental and physical health and in their tasks of  
59 taking care of their beloved. Given the little knowledge of habits and service preferences of family caregivers  
60 living in rural context and the complexity of the social problem, we will opt for integrating and deepening  
surveys' quantitative data with a traditional form of focus group"[49,50] Each focus group meeting will last

about 2 hours and will be conducted by two researchers specifically trained in qualitative research. The focus group meetings will be audio recorded. To include different point of view and enrich the discussion, the focus groups will involve both users (family caregivers) and service providers (ATSP), while researchers will have the role of coordinators and moderators. With the focus group, we want to recreate a situation similar of the ordinary process of opinions creation, allowing all participants to express with a peer discussion, thanks to the presence of a trained mediator. All focus groups will develop the discussion following these phases:

- Mutual acquaintance: presentation of the project, presentation of participants with their biographical info, and description of their role as informal caregiver;
- Focus on the needs: What are the difficulties of caregiving in the context of Valle Camonica, for them and for their elders;
- Insights, ideas for the new service : starting from emerged needs, what are the caregiver ideas for a new service, with a particular attention on information, educational and psycho-social help;
- Conclusions: Caregivers, together with the moderator and members of the team of research, try to merge ideas for the new service in a unique project idea and to define it accurately.

*Sampling.* Caregivers included in the first stage of the research that have given their availability will be invited to be involved also in focus groups. Given the numbers expected we will try to include all caregivers that wish to participate, knowing that logistic difficulties will lead us to some abandonment. We will follow a snow-ball sampling, to arrive to an average of 8-10 participants for each focus group.

*Data Analysis.* All focus groups will be transcribed and analyzed using content analysis [50, 51] with a deductive approach [52]. The content analysis will analyze conversations between caregivers, grouping together recurrent instances using a pre-existing coding frame [53]. To ensure the validity and replicability of the study, we will analyze and code data according to an accurate study design. Leveraging from the systemizing literature review's results (WP 2), we will create a theoretical framework based on the needs and ideas that arise from the psychosocial, educational, organizational interventions. This framework will be detailed in categories and constructed codes that support us in labelling the focus groups' transcript [54]. The codes that emerge from the literature may be changed or integrated during the coding process. We prefer to use a deductive approach since we would like to build up the existing theory with new findings [55]. To ensure the reliability of the analysis, two researchers will code the transcripts in parallel, analyzing and checking any inconsistency. Each of the two researcher will group and order codes in the pre-defined categories of the literature framework. In case codes do not fit with any of these categories, they will create new categories as long as the content is relevant and supported by data [56]. One the set of categories is well established by the two researchers, we will discuss results and assemble the final set of categories in high-level themes that represent the main concepts of investigation. Resulting themes and categories will be compared in term of similarities and differences with the ones that arise from the literature framework [57]. To deepen our understanding of the findings, we will investigate the relationships between themes and categories. If other authors agree on the reliability of the coding process, we will try to conceptualize and generalize results [58].

#### ***WP4 - First implementation, piloting and preliminary assessment***

*Objectives.* This WP is dedicated to the testing of the service ideas co-created in WP3 through a piloting action organized and delivered by ATSP. Specifically, the pilot study is aimed at:

- Assessing the feasibility and conditions for implementing the service in terms of effort and resources;
- Piloting the service;
- Evaluating the service.

*Tools and methods.* To check the consequences of services' ideas and to ensure the iterative improvement of the pilot, we will use a service prototyping approach [59]. Among the several prototyping techniques, we

1  
2  
3 choose “The Service Prototyping Practical Framework” that guides researchers in service prototyping process  
4 through six steps. First, the research team will have to state clearly the purpose of the service. Second, the team  
5 should define the most suitable and effective way to use the resources and skills for the service’s  
6 implementation [60]. To achieve this aim, we will perform a feasibility study for defining the capabilities and  
7 resources needed under legal, economic, operational, technical and scheduling point of view [61]. Third, the  
8 research team should choose the most suitable technique for implementing the service, in line with team and  
9 users’ knowledge and competences. Fourth, the team should define the drivers that evaluate the service  
10 resolution and quality. We will assess the pilot through a set of quantitative metrics suggested by the existing  
11 literature. For each activity of the pilot, we will identify the most appropriate set of indicators. Since the number  
12 of participants in this rural and remote area might not be very significant, we will integrate this quantitative  
13 data with interviews. Mixing both quantitative and qualitative data in a single study will allow us to improve  
14 the understanding of future issues related to the implementation of the pilot [62]. We will collect the opinion  
15 of the providers of the pilot with individual interviews. Fifth, the project team will have to verify the validity  
16 of the service prototyping leveraging on the results of the pilot’s assessment. Finally, the project team should  
17 check the service’s satisfaction, collecting the opinion of family caregiver with one focus group at the end of  
18 the pilot [60].  
19  
20  
21  
22

23 *Sample.* All the caregivers, whose elders are using at least one of the two type of homecare services identified  
24 in the WP1, will be invited to participate to the pilot. We will spread the project’s activities and meetings  
25 through both online and offline channels, to include all caregivers that wish to participate. ATSP will be in  
26 charge of the pilot delivery.  
27

28 *Data Analysis.* Once we will have collect the assessment’s results and the users’ opinions on the service, we  
29 will try to generalize results proposing a set of barriers and enablers that may have limited or facilitated the  
30 implementation of the pilot. We will start listing all possible barriers and enablers that will arise from the  
31 analysis of the pilot. Then, we will compare them in term of differences, similarities, frequency of occurrence  
32 and consistency. Finally, we will discuss the final list with the Research Team and other stakeholders involved  
33 in the project in order to check the reliability of results.  
34  
35

### 36 ***WP5 - Assessment transferability to other regions and stakeholder involvement***

37 *Objectives.* The transferability analysis, intends to make the insights and the idea of the new service better  
38 exportable to other similar extra-urban contexts. The transferability will be assessed in Valtellina, which is an  
39 area geographically close to Vallecamonica and shares the same demographic challenges and similar  
40 difficulties in the access to assistance and services with the specific aim to:  
41

- 42 • Investigate if the needs expressed by the family caregivers in mountainous and outreach communities  
43 are similar;
- 44 • Assess the transferability of the service ideas generated in WP 3;
- 45 • Engage stakeholders in the transferability, by adapting the service idea to the new specific context.  
46

47  
48 *Tools and methods.* The module will adopt a mixed methods design by using a qualitative study to integrate  
49 and deepen the previous quantitative one. In the first study, we will distribute to the people in charge of social  
50 and welfare services of local districts in Valtellina an exploratory survey for collecting their personal opinions  
51 and interests in the project. The survey’s aim is twofold. First, it would like to check the interests of the local  
52 districts in the project by investigating the correspondence between family caregivers’ needs. Second, it intends  
53 to understand the future issues that may arise in adopting the project in the new context. Since we do not expect  
54 significant number of respondents, we will integrate survey’s results by organizing focus groups with the  
55 providers of long-term household in the districts that express their interest in the study. The aim of this second  
56 qualitative study is to collect further insights about possible issues and barriers related to the transferability of  
57 the project in that area. Based on surveys and focus groups’ results, we will organize a feasibility study that  
58 will analyze legal, economic, operational, technical and scheduling constraints [63].  
59  
60

1  
2  
3 *Sample.* At the beginning, we will present the pilot’s activities and results to the professionals in charge of  
4 social and welfare services of local districts in Valtellina, collecting their interests in the project. We will  
5 involve and contact the districts interested in the project to discuss a possible transferability of the service in  
6 their territory. For each district that gives its availability, we will organize a focus group inviting the operators  
7 and staff that are managing and providing long-term household services for elders. The direct involvement and  
8 interaction with professionals and operators that might have to create the service will allow us to collect  
9 insights for adopting the service in the new context.  
10  
11

12  
13 *Data Analysis.* Data from surveys and focus group will be triangulated with official and internal documentation  
14 related to the welfare systems in Valtellina [64]. Results of the assessment of transferability will be verified  
15 thanks interviews with key actors of the local districts of Valtellina for collecting their opinions and checking  
16 the reliability of results.  
17  
18

## 19 20 **PATIENT AND PUBLIC INVOLVEMENT**

21  
22 Citizens and members of the public institutions will be involved in P4C at various stages of the study. We will  
23 hold information/ discussion sessions with key community stakeholders (caregivers, elderly citizens, public  
24 institutions) to co-create the envisaged family caregiver services and recommendations across the spectrum of  
25 the project. This will help to create a positive and receptive environment for the ultimate implementation of  
26 the outputs of the project. The involvement in the research Protocol of representatives belonging to both  
27 private and public institutions will allow to create synergic exchange between stakeholders having different  
28 points of view and resulting in alignment and cohesion of approach, without compromising independence of  
29 any party. In particular, the involvement of ATSP of Vallecamonica in the project will guarantee not only the  
30 access to the field and a more “ecological” insight on the ageing and caring dynamics in this territory. It will  
31 also guarantee the more concrete applicability of the ideas of services developed with the real commitment of  
32 the key welfare actors in the territory.  
33  
34

35 This inclusion of patients/public in this way helps with enhanced recruitment and enables these participants to  
36 share their experiences of taking part with others and to underline the importance of the study to people like  
37 themselves. Finally, citizens and public representatives will be actively involved in disseminating the results  
38 of the research.  
39  
40

## 41 42 **PROJECT IMPLICATIONS AND FUTURE POLICY**

43  
44 The P4C mission is to enhance and sustain the role of family caregiver in making the “ageing in place”  
45 imperative a sustainable reality in remote and rural areas. The results of the project will contribute to deliver  
46 more value to elderly citizens and health and social system, while making the welfare processes more efficient.  
47 Furthermore, by enhancing the skills and the psychological wellbeing of family caregivers of elderly citizens,  
48 the project will also contribute to improve quality of life and social inclusion of the elderly loved ones. Existing  
49 knowledge on meaningful family caregiver engagement will be aligned, and sustainably implemented through  
50 involvement of relevant stakeholders. The P4C project will deliver a transformative network structure and  
51 instruments by creating the resources for making the current welfare system more responsive to the needs of  
52 elderly citizens and of their family caregivers. To serve this mission, the research is a multi-stakeholder, multi-  
53 level and self-sustained project, which will have both short-term and long-term beneficial effects, as outlined  
54 below. Furthermore, by the implementation of the sustainability strategy the long-term impact is that family  
55 caregiver engagement will be a common standard in the welfare ecosystem guided by commonly accepted  
56 practices. Moreover, the P4C protocol is expected to sensitize family caregiver about the available resources  
57 to be activated in the territory and how to make the healthcare/welfare process more fluid and less fragmented.  
58 This would also reduce the waste of health and social resources.  
59  
60

1  
2  
3 Overall, all the stakeholders involved in the project may benefit from each other's expertise and develop a  
4 better understanding of how diverse viewpoints can positively drive and impact on successful ageing processes.  
5 The impact of this is mutual trust and understanding nurtured by both the P4C results and the participation in  
6 the project. The study might have also some limitation. The impact of Place4Carers activities should be  
7 conceivable as local. However, since it includes actions and strategies in order to assess the generalizability of  
8 the insights produced to other extra-urban contexts in Lombardy we are going to have some insights about  
9 results' exportability.  
10  
11  
12

### 13 **ETHICS AND DISSEMINATION**

14  
15 The study was approved by the Ethics Committees of both Università Cattolica del Sacro Cuore and  
16 Politecnico di Milano. Informed consent will be collected from all participants. Data will be treated in  
17 anonymized form and only the P4C research team will have access to the data.  
18

19 The research team will provide a wide dissemination of the key achievements and recommendations to diverse  
20 stakeholders through various activities, thus supporting the impact of the project outcomes. Moreover,  
21 caregivers will be central to dissemination of the baseline information, which helped to motivate community  
22 involvement during and beyond the study.  
23

24 According to these premises, the aims of the dissemination activities will be: (1) to generate awareness about  
25 the concept and the main aims of the project; (2) to ensure strategic and extensive outreach to the ageing  
26 research community at large and engage with all other external relevant initiatives and projects to ensure  
27 optimal synergies and cross-fertilization and avoid duplication of efforts; (3) to identify opportunities to  
28 collaborate in developing a cohesive and coherent ecosystem to support possible next phases of the project, its  
29 adoption and its sustainability.  
30  
31  
32  
33

34 **Contributors** GG is the study principal investigator and contributed to develop the study design and to write  
35 the protocol. SB, NM, CM, EG, MC, VG, CF, RF contributed to develop the study design and to write the  
36 protocol. All authors approved the final manuscript.  
37

38 **Funding** This project has been supported by a grant from Fondazione Cariplo, Italian private foundation (call  
39 'Ricerca sociale - 2017', rif. 2017-0955).  
40

41 **Competing interests** None declared.

42 **Patient consent for publication** Not required.

43 **Provenance and peer review** Not commissioned; externally peer reviewed.  
44  
45  
46  
47  
48  
49  
50  
51  
52  
53  
54  
55  
56  
57  
58  
59  
60

## References

- 1 Andrews GJ, Evans J, Wiles JL. Re-spacing and re-placing gerontology: Relationality and affect. *Ageing Soc* Published Online First: 2013. doi:10.1017/S0144686X12000621
- 2 Valentine G. *Social Geographies: Space and Society*. Harlow: : Prentice Hall/Pearson Education 2001.
- 3 Wiles J. Conceptualizing place in the care of older people: The contributions of geographical gerontology. *J. Clin. Nurs.* 2005. doi:10.1111/j.1365-2702.2005.01281.x
- 4 Kadam UT, Croft PR. Clinical multimorbidity and physical function in older adults: A record and health status linkage study in general practice. *Fam Pract* 2007;**24**:412–9. doi:10.1093/fampra/cmm049
- 5 Molinari E, Spatola C, Pietrabissa G, *et al*. The role of psychogeriatrics in healthy living and active ageing. In: *Active Ageing and Healthy Living: A Human Centered Approach in Research and Innovation as Source of Quality of Life*. IOS Press 2014. 122–33. doi:10.3233/978-1-61499-425-1-122
- 6 Van Malderen L, Mets T, De Vriendt P, *et al*. The Active Ageing-concept translated to the residential long-term care. *Qual Life Res* 2013;**22**:929–37. doi:10.1007/s11136-012-0216-5
- 7 Small N, Bower P, Chew-Graham CA, *et al*. Patient empowerment in long-term conditions: development and preliminary testing of a new measure. *BMC Health Serv Res* 2013;**13**:263. doi:10.1186/1472-6963-13-263
- 8 Ala Alwan, World Health Organization. Global status report on non-communicable diseases 2010. *Geneva Switz World Heal Organ* Published Online First: 2011. [http://www.who.int/nmh/publications/ncd\\_report\\_full\\_en.pdf?ua=1](http://www.who.int/nmh/publications/ncd_report_full_en.pdf?ua=1)
- 9 Bronfenbrenner U. Toward an experimental ecology of human development. *Am Psychol* Published Online First: 1977. doi:10.1037/0003-066x.32.7.513
- 10 Bacsu J, Jeffery B, Abonyi S, *et al*. Healthy Aging in Place: Perceptions of Rural Older Adults. *Educ Gerontol* Published Online First: 2014. doi:10.1080/03601277.2013.802191
- 11 Phillipson C, Scharf T. Rural and urban perspectives on growing old: Developing a new research agenda. *Eur. J. Ageing.* 2005. doi:10.1007/s10433-005-0024-7
- 12 Clare Wenger G. Myths and realities of ageing in rural Britain. *Ageing Soc* Published Online First: 2001. doi:10.1017/S0144686X01008042
- 13 Havens B, Hall M, Sylvestre G, *et al*. Social Isolation and Loneliness: Differences between Older Rural and Urban Manitobans. *Can J Aging / La Rev Can du Vieil* Published Online First: 2004. doi:10.1353/cja.2004.0022
- 14 Kinsella K. Urban and rural dimensions of global population aging: An overview. In: *Journal of Rural Health*. 2001. doi:10.1111/j.1748-0361.2001.tb00280.x
- 15 Winterton R, Warburton J. Does place matter? Reviewing the experience of disadvantage for older people in rural Australia. *Rural Soc.* 2011. doi:10.5172/rsj.20.2.187
- 16 Davey J. ‘Ageing in Place’: The Views of Older Homeowners on Maintenance, Renovation and Adaptation. *Soc Policy J New Zeal* 2006.
- 17 Clark DO, Frankel RM, Morgan DL, *et al*. The meaning and significance of self-management among socioeconomically vulnerable older adults. *Journals Gerontol - Ser B Psychol Sci Soc Sci* 2008;**63**. <http://www.scopus.com/inward/record.url?eid=2-s2.0-52949086809&partnerID=tZOtx3y1>
- 18 Gitlin LN. *International Handbook of Occupational Therapy Interventions*. Cham: : Springer International Publishing 2015. doi:10.1007/978-3-319-08141-0



1  
2  
3  
4  
5  
6  
7  
8  
9  
10  
11  
12  
13  
14  
15  
16  
17  
18  
19  
20  
21  
22  
23  
24  
25  
26  
27  
28  
29  
30  
31  
32  
33  
34  
35  
36  
37  
38  
39  
40  
41  
42  
43  
44  
45  
46  
47  
48  
49  
50  
51  
52  
53  
54  
55  
56  
57  
58  
59  
60

- 19 Fabbricotti IN. Integrated care in Europe: description and comparison of integrated care in six EU countries. *Int J Integr Care* Published Online First: 2003. doi:10.5334/ijic.86
- 20 Leichsenring K. Developing integrated health and social care services for older persons in Europe. *Int J Integr Care* Published Online First: 2004. doi:10.5334/ijic.107
- 21 Sixsmith J, Sixsmith A, Fänge AM, *et al.* Healthy ageing and home: The perspectives of very old people in five european countries. *Soc Sci Med* Published Online First: 2014. doi:10.1016/j.socscimed.2014.01.006
- 22 Harper S. Economic and social implications of aging societies. *Science* (80-. ). 2014. doi:10.1126/science.1254405
- 23 Schorch M, Wan L, Randall D, *et al.* Designing for those who are overlooked - Insider perspectives on care practices and cooperative work of elderly informal caregivers. In: *Proceedings of the ACM Conference on Computer Supported Cooperative Work, CSCW*. 2016. doi:10.1145/2818048.2819999
- 24 Bień B, McKee KJ, Döhner H, *et al.* Disabled older people's use of health and social care services and their unmet care needs in six European countries. *Eur J Public Health* Published Online First: 2013. doi:10.1093/eurpub/cks190
- 25 Blumenthal D, Chernof B, Fulmer T, *et al.* Caring for high-need, high-cost patients - An urgent priority. *N. Engl. J. Med.* 2016. doi:10.1056/NEJMp1608511
- 26 Noel MA, Kaluzynski TS, Templeton VH. Quality Dementia Care: Integrating Caregivers into a Chronic Disease Management Model. *J Appl Gerontol* Published Online First: 2017. doi:10.1177/0733464815589986
- 27 Boehmer KR, Egginton JS, Branda ME, *et al.* Missed opportunity? Caregiver participation in the clinical encounter. A videographic analysis. *Patient Educ Couns* Published Online First: 2014. doi:10.1016/j.pec.2014.05.016
- 28 Wolff JL, Spillman BC, Freedman VA, *et al.* A national profile of family and unpaid caregivers who assist older adults with health care activities. *JAMA Intern Med* Published Online First: 2016. doi:10.1001/jamainternmed.2015.7664.
- 29 Rodrigues, R., Schulmann, K., Schmidt, *et al.* The indirect costs of long-term care. *Research Note*.2013
- 30 Schulz R, Beach SR. Caregiving as a risk factor for mortality: The caregiver health effects study. *J Am Med Assoc* Published Online First: 1999. doi:10.1001/jama.282.23.2215
- 31 Hasselkus BR, Murray BJ. Everyday occupation, well-being, and identity: The experience of caregivers in families with dementia. *Am J Occup Ther* Published Online First: 2007. doi:10.5014/ajot.61.1.9
- 32 Beals KP, Wight RG, Aneshensel CS, *et al.* The role of family caregivers in HIV medication adherence. *AIDS Care* Published Online First: 2006. doi:10.1080/09540120500275627
- 33 Barello, S; Castiglioni, C; Bonanomi, A; Graffigna G. THE CAREGIVING HEALTH ENGAGEMENT SCALE (CHE-s): Development and Initial Validation of a New Tool for Measuring Family Caregiver Engagement in Healthcare. Under submission. 2019;:1–16.
- 34 Barello S, Savarese M, Graffigna G. The role of caregivers in the elderly healthcare journey: Insights for sustaining elderly patient engagement. 2016. doi:10.1515/9783110452440-010
- 35 Provenzi L, Barello S, Fumagalli M, *et al.* A Comparison of Maternal and Paternal Experiences of Becoming Parents of a Very Preterm Infant. *JOGNN - J Obstet Gynecol Neonatal Nurs* 2016;**45**. doi:10.1016/j.jogn.2016.04.004
- 36 Provenzi L, Barello S, Graffigna G. Caregiver engagement in the neonatal intensive care unit: Parental needs, engagement milestones, and action priorities for neonatal healthcare of preterm

- 1  
2  
3 infants. In: Patient Engagement: A Consumer-Centered Model to Innovate Healthcare. 2016. 94–107.  
4 doi:10.1515/9783110452440-009  
5
- 6 37 Blakemore A, Hann M, Howells K, *et al.* Patient activation in older people with long-term conditions  
7 and multimorbidity: correlates and change in a cohort study in the United Kingdom. *BMC Health*  
8 *Serv Res* 2016;**16**:582. doi:10.1186/s12913-016-1843-2  
9
- 10 38 McMullen CK, Schneider J, Altschuler A, *et al.* Caregivers as healthcare managers: health  
11 management activities, needs, and caregiving relationships for colorectal cancer survivors with  
12 ostomies. *Support Care Cancer* 2014;**22**:2401–8. doi:10.1007/s00520-014-2194-3  
13
- 14 39 Goodman MS, Thompson VS, Thompson VS, *et al.* Community-based participatory research. In:  
15 *Public Health Research Methods for Partnerships and Practice*. 2018. doi:10.1201/9781315155722-1  
16
- 17 40 Page-Reeves J. Community-Based Participatory Research for Health. *Health Promot Pract* Published  
18 Online First: 2019. doi:10.1177/1524839918809007  
19
- 20 41 Hazzan AA, Ploeg J, Shannon H, *et al.* Caregiver perceptions regarding the measurement of level and  
21 quality of care in Alzheimer’s disease. *BMC Nurs* Published Online First: 2015. doi:10.1186/s12912-  
22 015-0104-8  
23
- 24 42 Tamiya N, Yamaoka K, Yano E, Use of home health services covered by new public long-term care  
25 insurance in Japan: Impact of the presence and kinship of family caregivers. *Int J Qual Heal Care*  
26 Published Online First: 2002. doi:10.1093/intqhc/14.4.295  
27
- 28 43 Papastavrou E, Kalokerinou A, Papacostas SS, *et al.* Caring for a relative with dementia: Family  
29 caregiver burden. *J Adv Nurs* Published Online First: 2007. doi:10.1111/j.1365-2648.2007.04250.x  
30
- 31 44 Afram B, Verbeek H, Bleijlevens MHC, *et al.* Predicting institutional long-term care admission in  
32 dementia: A mixed-methods study of informal caregivers’ reports. *J Adv Nurs* Published Online First:  
33 2015. doi:10.1111/jan.12479  
34
- 35 45 Corry M, While A, Neenan K, *et al.* A systematic review of systematic reviews on interventions for  
36 caregivers of people with chronic conditions. *J. Adv. Nurs.* 2015. doi:10.1111/jan.12523  
37
- 38 46 Van Ryn M, Sanders S, Kahn K, *et al.* Objective burden, resources, and other stressors among  
39 informal cancer caregivers: A hidden quality issue? *Psychooncology* Published Online First: 2011.  
40 doi:10.1002/pon.1703.  
41
- 42 47 Arksey, H., & O’Malley, L. Scoping studies: Toward a methodological framework. *International*  
43 *Journal of Social Research Methodology*, 8(1), 19–32.2005.  
44
- 45 48 Roter, D. L., Hall, J. A., Merisca, R., Nordstrom, B., Cretin, D., & Svarstad, B. Effectiveness of  
46 interventions to improve patient compliance: A meta-analysis. *Medical Care*, 36, 1138–1161.1998  
47 <https://doi.org/10.1097/00005650-199808000-00004>.  
48
- 49 49 Greenbaum, T.,, “The Handbook of focus group research”, Second Edition, SAGE Publication ,  
50 NY).1998.  
51
- 52 50 Corrao, S. II focus group. *Laboratorio sociologico metodologia e tecniche della ricerca sociale*,  
53 Franco Angeli Editore, Milano,2002. 5-25.  
54
- 55 51 Hsieh H.-F., & Shannon S. E. Three Approaches to Qualitative Content Analysis *Qualitative Health*  
56 *Research*, 2005, 15(9), 1277–1288. doi: 10.1177/1049732305276687  
57
- 58 52 Backman K & Hentinen M Factors associated with the self-care of home-dwelling elderly  
59 *Scandinavian Journal of Caring Sciences* 2001, 15, 195–202. doi: 10.1046/j.1471-6712.2001.00007.x  
60
- 61 53 Boyatzis RE, Transforming qualitative information: Thematic analysis and code development *Sage*  
62 *Publications*, Incorporated, Thousand Oaks Published Online First: 1998.  
63
- 64 54 Gioia D A, Price K N, Hamilton, A L, Thomas, J B, Forging an identity: An insider-outsider study of  
65 processes involved in the formation of organizational identity *Administrative Science Quarterly* 2010,

1  
2  
3  
4  
5  
6  
7  
8  
9  
10  
11  
12  
13  
14  
15  
16  
17  
18  
19  
20  
21  
22  
23  
24  
25  
26  
27  
28  
29  
30  
31  
32  
33  
34  
35  
36  
37  
38  
39  
40  
41  
42  
43  
44  
45  
46  
47  
48  
49  
50  
51  
52  
53  
54  
55  
56  
57  
58  
59  
60

55: 1–46. doi: 10.2189/asqu.2010.55.1.1.

- 55 Glaser, Barney G & Strauss, Anselm L. *The Discovery of Grounded Theory: Strategies for Qualitative Research*, Chicago *Aldine Publishing Company* Published Online First: 1967
- 56 Gilgun J, Coding in deductive qualitative analysis *Current Issues in Qualitative Research: An Occasional Publication for Field Researchers from a Variety of Disciplines*, 2011, 2(1), 1–4.
- 57 Hatch J A, *Doing Qualitative Research in Education Settings* State University of New York Press Published Online First: 2002
- 58 Hsieh H.-F., & Shannon, S. E. Three Approaches to Qualitative Content Analysis. *Qualitative Health Research* 2005, 15(9), 1277–1288. doi: 10.1177/1049732305276687
- 59 Saldana J, *The Coding Manual for Qualitative Researchers* *SAGE Publishing* Published First: 2015
- 60 Muurinen H, Service-user participation in developing social services: applying the experiment-driven approach *European Journal of Social Work* 2019, 22:6, 961-973. doi: 10.1080/13691457.2018.1461071
- 61 Passera S, Kärkkäinen H, Maila R, When, how, why prototyping? A practical framework for service development *ISPIM Conference Proceedings: The International Society for Professional Innovation Management*, 2012.
- 62 Bausea K, Radimerskya A, Iwanickia M, Albers A, Feasibility Studies in the Product Development Process *Procedia 24th CIRP Design Conference* 2014, 21, 473 – 478. doi: 10.1016/j.procir.2014.03.128
- 63 Creswell J W, & Plano Clark V L *Designing and conducting mixed methods research* (2nd ed.). Thousand Oaks, CA: Sage Publications, Inc Published Online First: 2011
- 64 Polit D F, & Beck C T, *Nursing research: Generating and assessing evidence for nursing practice* *Lippincott Williams and Wilkins* Published Online First: 2012.

Figure 1. A three-fold perspective on successful “ageing-in-place” processes

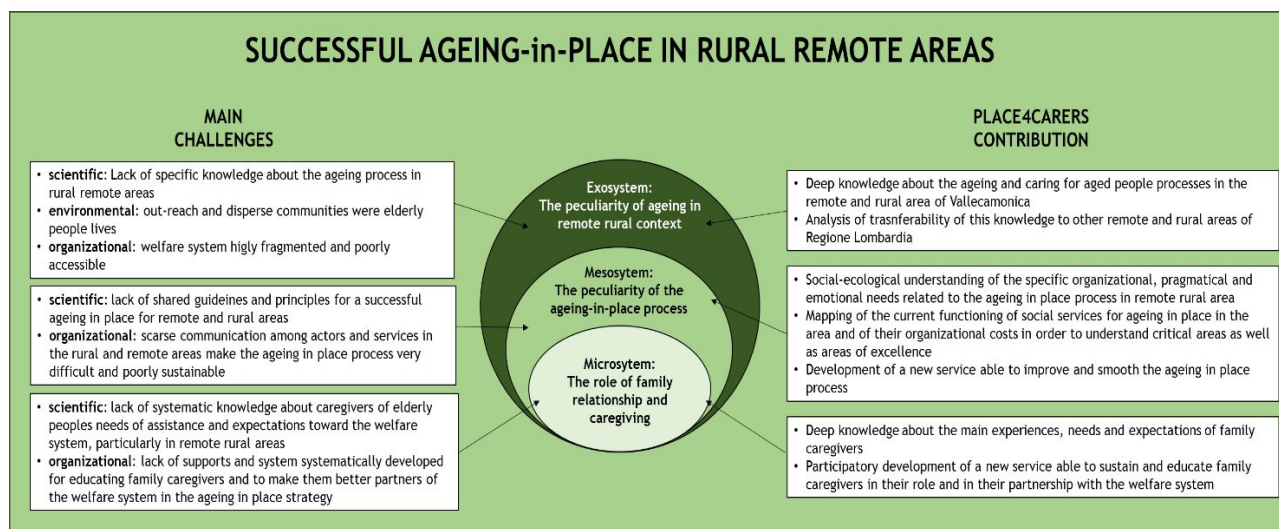

# BMJ Open

## PLACE4CARERS: A MIXED-METHOD STUDY PROTOCOL FOR ENG AGEING FAMILY CAREGIVERS IN MEANINGFUL ACTIONS FOR SUCCESSFUL AGEING IN PLACE

|                                 |                                                                                                                                                                                                                                                                                                                                                                                                                                                                                                                                                                                                                                                                                                                                                                                                                                                                                                                                      |
|---------------------------------|--------------------------------------------------------------------------------------------------------------------------------------------------------------------------------------------------------------------------------------------------------------------------------------------------------------------------------------------------------------------------------------------------------------------------------------------------------------------------------------------------------------------------------------------------------------------------------------------------------------------------------------------------------------------------------------------------------------------------------------------------------------------------------------------------------------------------------------------------------------------------------------------------------------------------------------|
| Journal:                        | <i>BMJ Open</i>                                                                                                                                                                                                                                                                                                                                                                                                                                                                                                                                                                                                                                                                                                                                                                                                                                                                                                                      |
| Manuscript ID                   | bmjopen-2020-037570.R1                                                                                                                                                                                                                                                                                                                                                                                                                                                                                                                                                                                                                                                                                                                                                                                                                                                                                                               |
| Article Type:                   | Protocol                                                                                                                                                                                                                                                                                                                                                                                                                                                                                                                                                                                                                                                                                                                                                                                                                                                                                                                             |
| Date Submitted by the Author:   | 15-May-2020                                                                                                                                                                                                                                                                                                                                                                                                                                                                                                                                                                                                                                                                                                                                                                                                                                                                                                                          |
| Complete List of Authors:       | GRAFFIGNA, GUENDALINA; UNIVERSITA' CATTOLICA DEL SACRO CUORE, PSYCHOLOGY<br>Barello, Serena; Università Cattolica , Department of Psychology<br>Morelli, Niccolò; UNIVERSITA' CATTOLICA DEL SACRO CUORE, PSYCHOLOGY; Università di Bologna, Department of Sociology and Business Law<br>Gheduzzi, Eleonora; Politecnico di Milano, Department of Management Engineering<br>Corbo, Massimo; Casa Cura Policlinico (CCP), Department of Neurorehabilitation Sciences<br>Ginex, Valeria; Casa Cura Policlinico (CCP), Department of Neurorehabilitation Sciences; Fondazione NEED Institute<br>Lascioli, Andrea; Azienda Territoriale per i Servizi alla Persona Vallecamonica<br>Ferrari, Roberta; Azienda Territoriale per i Servizi alla Persona Vallecamonica<br>Feriti, Carolina; Azienda Territoriale per i Servizi alla Persona Vallecamonica<br>Masella, Cristina ; Politecnico di Milano, Department of Management Engineering |
| <b>Primary Subject Heading</b>: | Health services research                                                                                                                                                                                                                                                                                                                                                                                                                                                                                                                                                                                                                                                                                                                                                                                                                                                                                                             |
| Secondary Subject Heading:      | Sociology, Qualitative research, Public health, Patient-centred medicine                                                                                                                                                                                                                                                                                                                                                                                                                                                                                                                                                                                                                                                                                                                                                                                                                                                             |
| Keywords:                       | Organisation of health services < HEALTH SERVICES ADMINISTRATION & MANAGEMENT, QUALITATIVE RESEARCH, HEALTH SERVICES ADMINISTRATION & MANAGEMENT                                                                                                                                                                                                                                                                                                                                                                                                                                                                                                                                                                                                                                                                                                                                                                                     |
|                                 |                                                                                                                                                                                                                                                                                                                                                                                                                                                                                                                                                                                                                                                                                                                                                                                                                                                                                                                                      |

SCHOLARONE™  
Manuscripts



I, the Submitting Author has the right to grant and does grant on behalf of all authors of the Work (as defined in the below author licence), an exclusive licence and/or a non-exclusive licence for contributions from authors who are: i) UK Crown employees; ii) where BMJ has agreed a CC-BY licence shall apply, and/or iii) in accordance with the terms applicable for US Federal Government officers or employees acting as part of their official duties; on a worldwide, perpetual, irrevocable, royalty-free basis to BMJ Publishing Group Ltd ("BMJ") its licensees and where the relevant Journal is co-owned by BMJ to the co-owners of the Journal, to publish the Work in this journal and any other BMJ products and to exploit all rights, as set out in our [licence](#).

The Submitting Author accepts and understands that any supply made under these terms is made by BMJ to the Submitting Author unless you are acting as an employee on behalf of your employer or a postgraduate student of an affiliated institution which is paying any applicable article publishing charge ("APC") for Open Access articles. Where the Submitting Author wishes to make the Work available on an Open Access basis (and intends to pay the relevant APC), the terms of reuse of such Open Access shall be governed by a Creative Commons licence – details of these licences and which [Creative Commons](#) licence will apply to this Work are set out in our licence referred to above.

Other than as permitted in any relevant BMJ Author's Self Archiving Policies, I confirm this Work has not been accepted for publication elsewhere, is not being considered for publication elsewhere and does not duplicate material already published. I confirm all authors consent to publication of this Work and authorise the granting of this licence.

1  
2  
3  
4  
5  
6  
7  
8  
9  
10  
11  
12  
13  
14  
15  
16  
17  
18  
19  
20  
21  
22  
23  
24  
25  
26  
27  
28  
29  
30  
31  
32  
33  
34  
35  
36  
37  
38  
39  
40  
41  
42  
43  
44  
45  
46  
47  
48  
49  
50  
51  
52  
53  
54  
55  
56  
57  
58  
59  
60

**PLACE4CARERS:**

**A MIXED-METHOD STUDY PROTOCOL FOR ENG AGEING FAMILY CAREGIVERS IN  
MEANINGFUL ACTIONS FOR SUCCESSFUL AGEING IN PLACE**

Guendalina Graffigna<sup>1</sup>, Serena Barelo<sup>1</sup>, Niccolò Morelli<sup>1,2</sup>, Eleonora Gheduzzi<sup>3</sup>, Massimo Corbo<sup>4</sup>, Valeria  
Ginex<sup>4,5</sup>, Roberta Ferrari<sup>6</sup>, Andrea Lascioli<sup>6</sup>, Carolina Feriti<sup>6</sup>, Cristina Masella<sup>3</sup>

1. Department of Psychology, EngageMinds HUB Research Center, Università Cattolica del Sacro Cuore di Milano, Italy.
2. Department of Sociology and Business Law, Università di Bologna, Italy
3. Department of Management Engineering, Politecnico di Milano, Italy
4. Department of Neurorehabilitation Sciences, Casa Cura Policlinico (CCP), Milano, Italy
5. Fondazione NEED Institute, Milano, Italy
6. Azienda Territoriale per i Servizi alla Persona Vallecarnonica, Breno, Italy

**Corresponding author at:**

Serena Barelo, PhD, PsyD  
Assistant Professor  
EngageMinds Hub – Consumer, Food & Health Research Center  
Department of Psychology  
Università Cattolica del Sacro Cuore, L.go Agostino Gemelli 1, 20143, Milano (Italy)  
Mail: serena.barelo@unicatt.it  
Phone : +39 02.7234.3863

1  
2  
3  
4  
5  
6  
7  
8  
9  
10 **Abstract**  
11  
12

13 **Introduction.** Engaging family caregivers could be a critical asset to make the “ageing-in-place” imperative  
14 a reality. This is particularly evident in rural and remote areas, where caregivers can fill the gaps that exist due  
15 to the fragmentation of the welfare system. However, there is little knowledge about the expectations that  
16 family-caregivers have towards healthcare services in rural and remote areas.

17 Place4Carers (P4C) project aims to co-produce an innovative organizational model of social and healthcare  
18 services for family caregivers of elderly citizens living in Vallecamonica (Italy). The project is expected to  
19 facilitate ageing-in-place for elderly citizens helping caregivers in their daily care activities.

20 **Methods and analysis.** Place4Carers is a community-based participatory research project that features 5 work  
21 packages. WP1 consisted of a survey of unmet needs of caregivers and elderlies receiving services in  
22 Vallecamonica. WP2 consisted of a scoping literature review to map services that provide interventions of  
23 support to caregivers living in rural and remote areas and promote engagement. WP3 organizes co-creation  
24 workshops with caregivers to co-design, co-manage and co-assess ideas and proposals for shaping caregivers’  
25 oriented services and organizational models. WP3 enriches the results of WP1 (survey) and WP2 (scoping  
26 literature review) and aims to co-create new ideas for intervention support with and for caregivers in relation  
27 to the objectives, features and characteristics of a new service able to address the caregiver needs and  
28 expectations. WP4 tests the service ideas co-created in WP3 through piloting an intervention based on ideas  
29 co-created with caregivers. Finally, WP5 assesses the transferability of the intervention to other similar  
30 contexts.

31 **Ethics and dissemination.** The study has been approved by the Ethics Committees of the Department of  
32 Psychology of Università Cattolica del Sacro Cuore and Politecnico of Milan. Results will be disseminated  
33 through peer reviewed journals, scientific meetings and meetings with the general population.

34 **Keywords:** Caregiver engagement; Community based participatory research; service co-creation; ageing-in-  
35 place  
36  
37  
38  
39  
40  
41  
42  
43  
44  
45  
46  
47  
48  
49  
50  
51  
52  
53  
54  
55  
56  
57  
58  
59  
60



### Strengths and limitation of this study

- ▶ This study aims to use participatory methods to co-design an accessible and sustainable service for family caregivers of elderly citizens. Participation in the planning, design and implementation of the service will include family caregivers, elderly citizens, researchers and representatives from the welfare system (as ATSP, the agency that provide home services to local community).
- ▶ To our knowledge this is the first co-produced study that uses participatory methods to enhance and sustain the role of family caregivers to make 'ageing in place' a sustainable reality in rural and remote areas.
- ▶ This study is a multi-stakeholder, multi-level and self-sustainable project, which will have both short-term and long-term beneficial effects on the possibility to continue the service deployment even after the end of the project
- ▶ The study is conducted in a specific setting and we recommend that the results should be deployed in other contexts to enhance their validity.
- ▶ The study provides a social-ecological framework, analysing the uniqueness of ageing in rural and remote areas, opportunities and challenges of the ageing-in-place imperative, and the role of family relationship and caregiving for elderly citizens (Figure 1)

## INTRODUCTION

### Rationale of the study

This study's rationale is based on the insight that successful ageing is a complex phenomenon that is intrinsically intertwined with the 'places' and spaces that people belong to [1]. Spaces are not only a physical backdrop to events, but also have social, psychological and symbolic meanings[2]. People may have quite different lived experiences, expectations and opinions related to a particular space. None of these aspects of space (social, physical and symbolic) is necessarily more 'real' or important than any other. Instead, they are interconnected and directly dependent on each other [3]. Ageing is a dynamic process that is largely influenced by physical, social and cultural spaces [4]. Literature [5–8] discusses the concept of space in the ageing process from a three-fold perspective of (i) ageing spaces as eco systems, (ii) ageing spaces as meso-systems and (iii) ageing spaces as micro-systems. These inter-relationships are particularly noticeable in rural and remote areas. The research setting is Vallecamonica, an outreach territory in Italy and local partner is ATSP the agency that provide home services to local community.

Vallecamonica is a mountainous territory in the northern part of the Lombardy Region. It is divided into 44 municipalities, all of which have been categorized as "peripheral" or "ultra-peripheral", due to a poor access to services, scarce infrastructures, limited economic prosperity and negative demographic trends. Residential areas in Vallecamonica are geographically dispersed, and the viability is not made easy by the configuration of the territory and the limited network of infrastructures and public transportation services. The population living in the area is characterized by an ageing index, computed as the ratio between the number of people aged 65 or more and those aged 14 or less, equal to 157,3 (the average for the Lombardy Region is 152,6; DGR X/5208). The high proportion of elderly people attests a situation of a multidimension frailty, with several social and health care needs. Against this widespread need, most of the municipalities are distant 20 to 40 km (or more) from the main hospital and health care structures (DGR X/5208). Unsurprisingly, the amount of social and assistance services required and provided to support the difficult access to services increases year after year.

By assuming a social-ecological framework of analysis [9] the Place4Carers project (P4C) will disentangle the role of spaces and of their interrelated dynamics in the ageing process.

1. *ageing space as ecosystem: the uniqueness of ageing in rural and remote areas.* In the Italian context, similarly to other European countries, the elderly are becoming a prominent feature of the population, especially in rural and remote areas [10]. Literature suggests that inequities in access to health care systems for elderly people in rural and remote populations are more frequent compared to access in urban areas.[11]. Ageing societies present a range of challenges for the health and aged care system, particularly in rural and remote areas where workforce shortage and lack of access to specialist services are confounding factors. It is interesting to note that scientific literature has less focused on ageing population in rural and remote areas, even if these areas have more elders than urban areas. [12]. For these reasons, we can say that researches on ageing populations are urban biased. The need for health and social care related services in rural and remote areas has not been met by service provision delivered in urban contexts [11,13,14]. Research focusing on older persons living at the geographical and social peripheries, argue that in policy and economic debates the local experiences of older persons living in rural and remote communities have often been ignored [15,16]. The P4C project aims to address this gap.

2. *ageing space as mesosystem: opportunity and challenges of the "ageing-in-place" imperative.* "ageing-in-place" is a popular term in current ageing policy and is today recognized as a strategic priority for making the ageing process more sustainable for both individuals and societies[17–20]. "Ageing in place" is defined as "remaining living in the community, with some level of independence, rather than in residential care" [21]. Some researches highlighted that people prefer to age in place [1] because it has been shown that this strategy enables effectively older persons to maintain independence, autonomy, and meaningful relations in terms of connection to social support, including friends and family [22,23]. Promoting the aging-in-place reduces the

Commented [1]:

Commented [2]:

1  
2  
3  
4  
5  
6  
7  
8  
9  
10  
11 economic expenditures of public institutions, impacting positively on governments, health and social care  
12 organizations, elders and their family [23]. The term “place” has several dimensions that are interrelated: a  
13 physical dimension that can be seen and touched like home or neighborhood, a social dimension involving  
14 relationships with people and the ways in which individuals remain connected to others, an emotional and  
15 psychological dimension, which has to do with a sense of belonging and attachment, and a cultural dimension,  
16 which has to do with older people’s values, beliefs, ethnicity, and symbolic meanings. Sustainable  
17 communities should offer affordable and holistic services and a continuum of care to effectively engage elderly  
18 and their family in effective and sustainable health and social care, enabling them to ageing in health in place.  
19 Several interventions and projects both at a national and international level aim to reduce the fragmentation of  
20 welfare services by putting citizens – and their needs - at the centre of service delivery. However, a study  
21 conducted in Europe [24] found that a fragmented system of services was unable to meet the holistic needs of  
22 ageing societies, because the integration between social and health services is complex, including problems in  
23 inter-disciplinary teamwork, financing, and legal aspects. Integration of health and social services is on the  
24 agenda of many ageing countries [25]. Furthermore, in rural and remote context, welfare and social system  
25 often results fragmented and poorly accessible, making the ageing in place a possible paradigm only with high  
26 care out-of-pocket costs for families that have to take care alone of their elders. Few interventions devoted to  
27 ageing in place are related to digital/telemedicine intervention, without regarding the social aspect of care [26].

28  
29 *3. ageing space as microsystem: the role of family relationship and caregiving for elderly citizens.* Family  
30 caregiver engagement is indeed regarded as a key factor to improve the quality and the sustainability of care  
31 services for the elderly [27–32]. Several studies have shown that caregivers are the invisible backbone of social  
32 and health care settings, particularly in rural and remote areas, as they facilitate the integration especially in  
33 areas and communities with limited access to services[33]. Despite their unquestionable role in increasing the  
34 chance of ageing-in-place for the elderly people they take care of, the caregivers experience several criticalities  
35 such as burden, social isolation and depletion. In fact, caregivers attest a critical decrease on their quality of  
36 life [34], and they report health issues, such as tiredness, insomnia, depression, weight loss or gain, drug use  
37 and need for psychological support [35]; these issues are frequently reported by women, especially if older.  
38 The European Commission report on “The indirect cost of long term care” (2013) [36] reveals that situation  
39 of psycho-social distress is widespread for caregivers not only in Italy but also in other countries. This is  
40 especially the case for caregivers of elderly people [37] and for those who are required to dedicate a significant  
41 amount of time to caring activities [37]. Actually, the caregivers of elderly people often become the primary  
42 interlocutors for the health and social care services to take decisions over the patients’ therapies and long-term  
43 treatments [38].

44 Moreover, caregivers support the compliance to treatments and therapies and they support the older persons in  
45 managing follow-ups and clinical exams [39]. Last, caregivers are often the primary sources of psychological  
46 support and empathy for the care receiver and for whom they represent the main reference. Against this  
47 background, research shows that family caregivers who are more engaged in the care journey of their loved  
48 one have more capability to deal with stressful situations such as caregiving and thus, have less anxiety and  
49 depression and better perceived health [40–43]. By feeling more empowered and engaged in the caregiving  
50 tasks, caregivers might also reach a better work-family balance.

51 Appropriate engagement and tailored support of caregivers have the potential to improve their experiences and  
52 quality of life and facilitate shared decision making while enhancing the quality of care provided to older  
53 persons and reducing the use of unnecessary health and social services [44], as well as increasing the  
54 effectiveness of health and social care interventions [45]. Furthermore, supporting the role of informal carers  
55 (i.e. family and friends providing mostly unpaid care to frail seniors) is important to provide an adequate  
56 continuum of care between informal and formal care.

57 Figure 1 describes the threefold social-ecological framework of analysis adopted by P4C.

58  
59  
60  
[please, insert figure 1 around here]

Commented [3]:

## Aims

The project aims to achieve the following objectives:

1. to explore, understand and measure caregiver' needs in terms of education, welfare, assistance and social inclusion and in relation to the services planned by the local home care agency, which is responsible for the delivery of basic social services and social assistance towards fragile people in the territory of Vallecamonica;
2. to assess the cost (both economic and social) sustained by families when caring for their elderly relatives and to understand the critical aspects faced when accessing and using welfare services that are present in the territory;
3. to co-produce a new - better accessible and sustainable - service targeted to family caregivers of elderly citizens on the basis of the participative cooperation among family caregivers, elderly citizens, researchers and welfare system representatives;
4. to test the transferability of the new service concept in other and similar rural and remote territories of the Lombardy Region (Italy).

## METHODS AND ANALYSIS

### Methodological approach

The proposed study is designed according to a Community Based Participatory Research (CBPR) approach [46,47], to engage and to capture the perspectives of all the relevant stakeholders involved in the home based service of long term care. Thanks to its participatory nature, the P4C project will be not only the occasion to deepen the ageing and caregiving **dynamics** in the specific outreach territory of Vallecamonica. It will also be an innovative co-productive setting, where to engage older citizens, their caregivers and the welfare system to generate ideas for more accessible, effective and economically sustainable welfare services targeted to family caregivers.

This approach has the value to be grounded in the needs of communities and of the community-based organizations that serve them. It will allow community transformation and social change by directly engaging target stakeholders and stakeholders' knowledge in the research process and its outcomes. This is a partnership approach to research that equitably involves community members, organizational representatives, and researchers in all the phases of the research process. In this approach, all partners contribute expertise and ownership to reach shared decisions and to make the knowledge produced best rooted in the community experience and more able to be translated into the practice of services development.

In this project, we will mainly focus on the community of Vallecamonica, with 41 municipalities, and twelve hundred thousands inhabitants, 19% over 65 years old [48], to deepen the unique experiences and needs of family caregivers caring for elderly citizens located in that geographic area. Moreover, the involvement of the local home care agency (ATSP) will be a key asset in this project, in order to produce knowledge well integrated with situated interventions and policies and thus better able to generate social change and to improve the health and quality of life of community members. The ATSP is a public agency that coordinates third parties in delivering services to fragile persons as old people, families, disabled people with professional social service. Community members, professionals belonging to home care agency and the researchers will collaborate in all the phases of the project in order to improve its sustainability and its ability to set the ground not only for a better knowledge production process, but also for the translation of such knowledge into a real opportunity for policy, organizational and social change. We will also guarantee the continuous methodological and scientific supervision of an International Advisory Board in order to validate the research design and the tools used in the research. An important aspect of this study is to provide insight from all the stakeholders' perspectives by involving them in all the phase of the research process.

Commented [4]:

## Study Design

The Place4Carer Research Protocol is articulated in 5 work packages (WPs), as described in the next paragraphs.

### *WP1 – Quantitative survey to define family caregivers needs, current services usage and sustained costs*

*Objectives.* This research module is conceived as an extensive assessment on the entire population of family caregivers of elderly people receiving services from the ATSP in Vallecamonga aimed to:

- Analyze, quantify and map experiences, unmet needs, preferences and expectations of support and assistance of family caregivers involved in elderly care, in general and in relation to the specific service offered by ATSP;
- Perform a service and costs analysis in order to map the actual use of available services by caregivers and the direct costs sustained by families for the elderly care and support;
- Identify the main target of caregiver (i.e. the more needing ones) to which address the new service and to be involved in the following participatory phases of the project.

*Tools and methods.* A quantitative descriptive survey was designed comprehending measures of caregivers' needs, levels of engagement and questions to gather information about the direct costs sustained by the families for providing assistance to the elderly (i.e. out of pocket payments both for the services received by the ATSP and for additional assistance services). The survey was administered by a psychologist at caregivers' homes. The WP1 started in march 2018 and finished in June 2018.

*Sampling.* Only family caregivers that had concrete difficulties in the daily care of their care receivers were involved in the survey. We focused on caregivers whose elders had activated home-based long-term care services from two to 12 months [49] and had been living in Vallecamonga. Based on this constraint, the research identified five the local providers that were offering this type of services in the valley and expressly consented to participate in the project (i.e. ATSP and four rest houses). In doing so, the selecting criteria were: family caregivers, whose elders have been living at home in Vallecamonga and assisted from 2 to 12 months by one of the five home-based long-term care service providers involved in the project.

The overall number of family caregivers eligible for the study was around 321. We asked the five service providers to explain the research and its objectives to all eligible family caregivers and to collect their interest in the project. Since caregivers do not usually have the time nor the interest in explaining their personal condition to unknown parties [50], the sample size of family caregivers that are both eligible and interested in the research was quite limited: 147 caregivers. To increase the response rate, a psychologist contacted by phone all the caregivers of the sample to organize with them face-to-face meetings for submitting the survey. Despite this approach required time and resources, it reduced the number of bias that may arise during the self-administration of the questionnaire. We expected that the large majority of family caregiver have medium-low health literacy and education. Thus, the presence and assistance of a psychologist supported them in understanding and filling the questionnaire correctly, by reducing the number of missing data [51]. Based on this approach, we reached a satisfactory response rate of 45% [52]. Caregivers involved in this WP1 are invited to participate in WP3 for the co-creation of a new service.

*Data Analysis.* Survey data were anonymized, stored in an electronic database and shared with the research partners. The data collected in the survey were analyzed with the aim of taking a clear picture of the population of the family caregivers in the area, in terms of psycho-social needs, level of engagement, out-of-pocket expenditures for caregiving activities (e.g. drugs, private professional assistance, transportation) [53] and cost of time loss for employment, calculated as the time used by the family caregiver in caring activity multiplied by the average cost of an Italian professional caregiver [54]. We designed the questionnaire by using tested scales and clear and familiar terms. The analysis of data was organized in four main steps. First, we performed a preliminary data analysis by computing descriptive statistics, such as mean, median, mode and standard deviation of all variables of the questionnaire. Second, we carried out a confirmatory factor analysis that aimed

1  
2  
3  
4  
5  
6  
7  
8  
9  
10  
11 at confirming the theoretical relationships between factors and their related variables of tested scales used in  
12 the questionnaire. Third, we investigated the correlation between psycho-social needs, level of engagement  
13 and economic expenditures. Finally, we performed a cluster analysis to identify sub-groups of caregivers that  
14 had similarities in terms of psycho-social needs, level of engagement and economic expenditures. Overall, this  
15 analysis helped us to understand the condition of caregivers by developing a taxonomy that cluster caregivers  
16 with similar needs, level of engagement and economic expenditures.

### 17 **WP2 – Analysis of the literature to map existing initiatives and services for caregiver engagement**

18  
19 *Objective.* The aim of WP2 was to map the good practices described in the literature related to support and  
20 engage family caregivers of elderly people in rural and remote settings. The WP2 started in May 2018, mapping  
21 interventions published in scientific articles and finished in February 2019 with the acceptance of the scoping  
22 review in a scientific journal.

23 *Tools and Methods.* WP2 adopted a scoping review approach as set out by Arksey and O'Malley (2005)[55].  
24 We explored the conceptualization of ageing and of intervention mechanisms adopted to promote caregiver's  
25 engagement which oriented such interventions. The following search-terms have been adopted: [(caregivers  
26 OR family member\*) AND ( ageing OR elderly\* OR old\*) OR (patient\*) AND (support OR intervention OR  
27 program OR education OR counselling) AND (rural\* OR mountain\* OR "hard to reach"\*)]. The terms  
28 caregivers and family members was adopted in order to differentiate from professional, paid caregivers. The  
29 terms patients or older people were included to indicate the care receiver. Moreover, we included the terms  
30 support, intervention, program, education, counselling, in order to map a broader variety of initiatives. Finally,  
31 as our primary interest is on hard to reach areas, we included the terms rural, mountain and hard to reach. We  
32 originally included also the term remote, but the research did not give any new result, as the notion of remote  
33 context is still not explored in literature research. We checked also qualitatively the results of the search string,  
34 reading titles, abstracts and full text.

35  
36 This scoping review was carried throughout the following scientific databases: Scopus, Psych-Info, Cinhal,  
37 Pubmed.

38  
39 *Data Analysis.* For the data analysis, we followed the Arksey & O' Malley approach[55]. All articles were  
40 merged in a unique Excel database in order to remove duplicates. Secondly, titles and abstracts were checked  
41 for the inclusion criteria, and in cases of ambiguity, also full texts were read in order to be sure for the inclusion.  
42 Moreover, the reference list were screened in order to identify additional material. Our inclusion criteria were  
43 related to data and language of publication, accessibility of full text and focus of intervention, type of  
44 caregivers, age of care-receivers and context of intervention. Articles should be published from 2012,  
45 recognized European Year of Active ageing, in English, and the full text must be accessible. We decided to  
46 start from 2012 as, considering that year as starting date, we identified 2545 articles, a consistent result. Among  
47 all the articles selected, no-one cited previously interventions. Moreover, articles must focus on interventions  
48 during the planning, piloting, implementation or analysis of the results. Finally, receivers of these interventions  
49 must be informal caregivers of family members. The care receivers, as mentioned before, should be over 60  
50 years old. On the other side, exclusion criteria were applied to articles that reflect on the necessity to provide  
51 intervention to caregivers, without providing a service, are not included. Finally, the geographical context of  
52 the provided service must be a hard to reach area, including rural and remote or mountain area. Articles were  
53 analyzed at two levels. (1) Intervention characteristics: objective of the intervention, characteristics of the  
54 receiver (by type of patient), context of intervention, presence or absence of technologies, individual or group  
55 setting, tools and duration of the intervention. More precisely, the retrieved studies were organized according  
56 to their main objective (i.e. psychosocial interventions, educational interventions, organizational  
57 interventions.) following the categorization of Roter et al (1998) [56]. (2) Study characteristics: country, study

Commented [5]:

design (randomized controlled trial “RCT”, controlled trial “CT”, cross-sectional “CS”, pilot “P”), sample and number of participants, outcome measures and results.

### **WP3 – Co-creation workshop with caregivers**

*Objectives.* This work package of the protocol is dedicated to co-design, co-manage and co-assess (together with family caregivers, service providers and researchers) new ideas about a new service. The objectives and features of the new service should be able to address caregivers’ needs and expectations that emerged in WP1 and take a cue from the good practices suggested by the results of the scoping literature review in WP2. This analysis is a unique opportunity for discussing with family caregivers on the challenges of the aging-in-place imperative in the context of rural and remote areas and co-designing, co-managing and co-assessment along all the phases of the project with them a possible solution. The WP3 started in July 2018 and is expected to finish by September 2020.

*Sampling.* Only family caregivers that highlighted their interest in the project during the WP1 are eligible to participate in the co-creation workshops. Thus, the selecting criteria are: family caregivers that participate in WP1 and whose elders have been living at home in Vallecacamonica and assisted by one of the five home-based long-term care service’s providers. A psychologist is inviting caregivers by phone by calling them on random order to arrive to an average of 8-10 participants for each workshop. To increase the participation rate, we are trying to invite 10 to 12 caregivers at each workshop, knowing that logistical difficulties often lead us to some abandonment. Based on literature suggestions and the sample dimension, we expect to organize a minimum of 3 to 6 co-creation workshops in the co-design, co-managing and co-assessment phases of the service cycle [57].

*Tools and methods.* We carry out co-creation workshops in three main phases of the service life cycle, i.e. design, managing and assessment. Each workshop lasts about 2 hours and is conducted by two researchers specifically trained in qualitative research. To include different point of view and enrich the discussions, the workshops involve both users (family caregivers) and service providers (ATSP). The workshops are audio recorded.

In the design phase of the service, we involved family caregivers to identify their needs and to co-design new services for supporting them. Researchers facilitate the co-design workshops using the following steps:

- Mutual acquaintance: presentation of the project, presentation of participants with their biographical info, and description of their role as informal caregiver;
- Focus on the needs: What are the difficulties of caregiving in the context of Vallecacamonica, for them and for their elders;
- Insights, ideas for the new service : starting from emerged needs, what are the caregiver ideas for a new service, with a particular attention on information, educational and psycho-social help;
- Conclusions: caregivers, together with the moderator and members of the team of research, try to merge ideas for the new service in a unique project idea and to define it accurately.

In the managing and assessment phases of the service, we involve family caregivers to collect their opinions about the service’s activities. While the caregivers’ feedbacks in the managing phase are used to improve the service’s activities currently underway, in the assessment phase they will support researchers in assessing the service after its conclusion. Researchers facilitate the co-managing and co-assessment workshops accomplishing the following steps:

- Mutual acquaintance: presentation of the results of ongoing service pilot, highlighting the number of activities, the participation and satisfaction rate of the caregivers involved;
- Opinions, feedbacks on the ongoing service: starting from service’s results, what are the caregiver suggestions for improving the ongoing service (i.e. co-managing phase) or for assessing the overall service results (i.e. co-assessment phase);

- 1  
2  
3  
4  
5  
6  
7  
8  
9
- 10 • Conclusions: caregivers, together with the moderator and members of the team of research, try to make practical suggestions for improving the new service both during its implementation and after its conclusion.
- 13

14 *Data Analysis.* All workshops will be transcribed and analyzed using content analysis [58,59] with an inductive approach [60]. Since we investigate a specific phenomenon (i.e. aging in place) by observing the behaviors of family caregivers, we prefer to adopt an open and flexible analysis of data [61]. We will start coding the transcripts by using an open coding approach and grouping relevant concepts in categories [62]. Then, we will investigate the relationships between categories and creating higher-order themes. The coding process will continue until all the relevant insights will be coded and data saturation will be reached [63]. To ensure the reliability of the analysis, two researchers will code the transcripts in parallel, analyzing and checking any inconsistency. Then, authors will discuss results and assemble the final set of categories in high-level themes that represent the main concepts of investigation [64]. Resulting themes and categories will be compared in term of similarities and differences with the results of WP1 and WP2 [65].

Commented [6]:

#### 24 **WP4 - Piloting and preliminary assessment**

25 *Objectives.* This WP is dedicated to the testing of the service ideas co-created in WP3 through a piloting action organized and delivered by ATSP. Specifically, the pilot study is aimed at:

- 28 • Assessing the feasibility and conditions for implementing the service in terms of effort and resources;
- 29 • Piloting the service;
- 30 • Evaluating the service.

31 The WP4 started in April 2019 and is expected to end by September 2020.

32 *Tools and methods.* To test services' ideas and to ensure the iterative improvement of the pilot, we are using a service prototyping approach [66]. Among the several prototyping techniques, we have chosen "The Service Prototyping Practical Framework" that guides researchers in service prototyping process through six steps. First, the research team have stated clearly the purpose of the service. Second, the team have defined the most suitable and effective way to use the resources and skills for the service's implementation [67]. To achieve this aim, we have performed a feasibility study for defining the capabilities and resources needed under legal, economic, operational, technical and scheduling point of view [68]. Third, the research team have chosen the most suitable technique for implementing the service, in line with team and users' knowledge and competences. Fourth, the team will define the drivers that evaluate the service resolution and quality. We will assess the pilot through a set of quantitative metrics suggested by the existing literature. For each activity of the pilot, we will identify the most appropriate set of indicators. Since the number of participants in this rural and remote area might not be very significant, we will integrate this quantitative data with interviews. Mixing both quantitative and qualitative data in a single study will allow us to improve the understanding of future issues related to the implementation of the pilot [69]. We will collect the opinion of the providers of the pilot with individual interviews. Fifth, the project team will have to verify the validity of the service prototyping by using the results of the pilot's assessment.

46 *Sample.* All the caregivers, whose elders are using at least one of the two type of homecare services identified in the WP1, are invited to participate to the pilot. We are spreading the project's activities and meetings through both online and offline channels, to include all caregivers that wish to participate. ATSP is in charge of the pilot delivery.

47 *Data Analysis.* Once we will have collect the assessment's results and the users' opinions on the service, we will try to generalize results proposing a set of barriers and enablers that may have limited or facilitated the implementation of the pilot. We will start listing all possible barriers and enablers that will arise from the

10



1  
2  
3  
4  
5  
6  
7  
8  
9  
10  
11  
12  
13  
14  
15  
16  
17  
18  
19  
20  
21  
22  
23  
24  
25  
26  
27  
28  
29  
30  
31  
32  
33  
34  
35  
36  
37  
38  
39  
40  
41  
42  
43  
44  
45  
46  
47  
48  
49  
50  
51  
52  
53  
54  
55  
56  
57  
58  
59  
60

analysis of the pilot. Then, we will compare them in term of differences, similarities, frequency of occurrence and consistency. Finally, we will discuss the final list with the research team and other stakeholders involved in the project in order to check the reliability of results.

#### **WP5 Assessment of transferability to other regions and stakeholder involvement**

*Objectives.* The transferability analysis, intends to make the insights and the idea of the new service better exportable to other similar extra-urban contexts. The transferability is assessed in Valtellina, which is an area geographically close to Vallecamonica and shares the same demographic challenges and similar difficulties in the access to assistance and services with the specific aim to:

- Investigate if the needs expressed by the family caregivers in mountainous and outreach communities are similar;
- Assess the transferability of the service ideas generated in WP 3;
- Engage stakeholders in the transferability, by adapting the service idea to the new specific context.

The WP5 started in December 2019 and is expected to end by December 2020.

*Tools and methods.* The module adopts a mixed methods design by using a qualitative study to integrate and deepen the previous quantitative one. In the first study, we will distribute an exploratory survey to the head of service providers in charge of social and welfare services for elders living in Valtellina. We will involve head of service providers because they know the territory and the needs of family caregivers, thus, they can give us an objective and valuable opinion on the P4C project and its implementation's effectiveness in Valtellina. The survey's aim is twofold. First, it checks the interests of the local districts in the project by investigating the correspondence with family caregivers' needs. Second, it intends to understand the future issues that may arise in adopting the project in the new context. Since we do not expect significant number of respondents, we will integrate survey's results by organizing focus groups with the providers of long-term household in the districts that express their interest in the study. The aim of this second qualitative study is to collect further insights about possible issues and barriers related to transferability of the project in that area. Based on surveys and focus groups' results, we will organize a feasibility study that will analyze legal, economic, operational, technical and scheduling constraints [70]. Even if in this project we will not deliver a new service in another territorial context, we want to put the basements for a transferability that could be done in another action research project.

*Sample.* At the beginning, we will present the pilot's activities and results to the professionals in charge of social and welfare services of local districts in Valtellina, collecting their interests in the project. We will involve and contact the districts interested in the project to discuss a possible transferability of the service in their territory. For each district that will give us its availability, we will organize a focus group inviting the operators and staff that are managing and providing long-term household services for elders. The direct involvement and interaction with professionals and operators that might be in charge to create the service will allow us to collect insights for adopting the service in the new context.

*Data Analysis.* Data from surveys and focus group will be triangulated with official and internal documentation related to the welfare systems in Valtellina [71]. Results of the assessment of transferability will be verified through interviews with key actors of the local districts of Valtellina for collecting their opinions and checking the reliability of results.

#### **PATIENT AND PUBLIC INVOLVEMENT**

Citizens and members of the public institutions are involved in P4C at various stages of the study. We are holding information/ discussion sessions with key community stakeholders (caregivers, elderly citizens, public institutions) to co-create the envisaged family caregiver services and recommendations across the spectrum of the project. This helps to create a positive and receptive environment for the ultimate implementation of the

1  
2  
3  
4  
5  
6  
7  
8  
9  
10  
11  
12  
13  
14  
15  
16  
17  
18  
19  
20  
21  
22  
23  
24  
25  
26  
27  
28  
29  
30  
31  
32  
33  
34  
35  
36  
37  
38  
39  
40  
41  
42  
43  
44  
45  
46  
47  
48  
49  
50  
51  
52  
53  
54  
55  
56  
57  
58  
59  
60

outputs of the project. The involvement in the research Protocol of representatives belonging to both private and public institutions is allowing us to create synergic exchange between stakeholders having different points of view and resulting in alignment and cohesion of approach, without compromising independence of any party. In particular, the involvement of ATSP of Vallecamonica in the project is guaranteeing the access to the field and a more “ecological” insight on the ageing and caring dynamics in this territory. It is also guaranteeing the more concrete applicability of the ideas of services developed with the real commitment of the key welfare actors in the territory.

This inclusion of patients/public in this way helps with enhanced recruitment and enables these participants to share their experiences of taking part with others and to underline the importance of the study to people like themselves. Finally, citizens and public representatives are actively involved in disseminating the results of the research.

## PROJECT IMPLICATIONS AND FUTURE POLICY

The P4C mission is to enhance and sustain the role of family caregiver in making the “ageing in place” imperative a sustainable reality in rural and remote areas. The results of the project will contribute to deliver more value to elderly citizens and health and social system, while making the welfare processes more efficient. Furthermore, by enhancing the skills and the psychological wellbeing of family caregivers of elderly citizens, the project will also contribute to improve quality of life and social inclusion of the elderly loved ones. Existing knowledge on meaningful family caregiver engagement will be aligned, and sustainably implemented through involvement of relevant stakeholders. The P4C project will deliver a transformative network structure and instruments by creating the resources for making the current welfare system more responsive to the needs of elderly citizens and of their family caregivers. To serve this mission, the research is a multi-stakeholder, multi-level and self-sustained project, which will have both short-term and long-term beneficial effects, as outlined below. Furthermore, by the implementation of the sustainability strategy the long-term impact is that family caregiver engagement will be a common standard in the welfare ecosystem guided by commonly accepted practices. Moreover, the P4C protocol is expected to sensitize family caregiver about the available resources to be activated in the territory and how to make the healthcare/welfare process more fluid and less fragmented. This would also reduce the waste of health and social resources.

Overall, all the stakeholders involved in the project may benefit from each other’s expertise and develop a better understanding of how diverse viewpoints can positively drive and impact on successful ageing processes. The impact of this is mutual trust and understanding nurtured by both the P4C results and the participation in the project. The study might have also some limitation. The impact of Place4Carers activities should be conceivable as local. However, since it includes actions and strategies in order to assess the generalizability of the insights produced to other extra-urban contexts in Lombardy, we are going to have some insights about results’ exportability.

## ETHICS AND DISSEMINATION

The study was approved by the Ethics Committees of both Università Cattolica del Sacro Cuore and Politecnico di Milano. Informed consent will be collected from all participants. Data will be treated in anonymized form and only the P4C research team will have access to the data.

The research team will provide a wide dissemination of the key achievements and recommendations to diverse stakeholders through various activities, thus supporting the impact of the project outcomes. Moreover, caregivers will be central to dissemination of the baseline information, which helped to motivate community involvement during and beyond the study.

1  
2  
3  
4  
5  
6  
7  
8  
9  
10  
11 According to these premises, the aims of the dissemination activities will be: (1) to generate awareness about  
12 the concept and the main aims of the project; (2) to ensure strategic and extensive outreach to the ageing  
13 research community at large and engage with all other external relevant initiatives and projects to ensure  
14 optimal synergies and cross-fertilization and avoid duplication of efforts; (3) to identify opportunities to  
15 collaborate in developing a cohesive and coherent ecosystem to support possible next phases of the project, its  
16 adoption and its sustainability.

## 17 **POTENTIAL LIMITATIONS**

18  
19 The present protocol paper presents at least two possible limitations related to the target population chosen for  
20 this study. First, we expect a small sample size in WP1, WP3 and WP4, due to the peculiarity of the rural and  
21 remote context that limits the generalization of the research findings [72]. Second, the direct involvement in  
22 the design phase of the service may influence its level of innovativeness. Since the target population have  
23 medium-low level managerial or technological capabilities, we expect to identify low innovative service  
24 solution that may not involve any usage of technology. However, we believe that the investigation of the  
25 conditions of family caregivers in rural and remote areas is innovative 'per se' [12] and gives new insights  
26 regarding the opinions of this marginalized population that are usually excluded from the regional and national  
27 policies [73]. By explaining this protocol research, we would like to foster the investigation of marginalized  
28 population in rural and remote areas for reducing the social, economic and health discrepancies with the urban  
29 areas.

30  
31 **Contributors** GG is the study principal investigator and contributed to develop the study design and to write  
32 the protocol. SB, NM, CM, EG, AL, MC, VG, CF, RF contributed to develop the study design and to write the  
33 protocol. All authors approved the final manuscript.

34  
35 **Funding** This project has been supported by a grant from Fondazione Cariplo, Italian private foundation (call  
36 'Ricerca sociale - 2017', rif. 2017-0955).

37  
38 **Competing interests** None declared.

39  
40 **Patient consent for publication** Not required.

41  
42 **Provenance and peer review** Not commissioned; externally peer reviewed.

43  
44 **Acknowledgement:** The authors would like to acknowledge the support of the four local nursing homes, i.e.  
45 Fondazione Onlus Ninj Beccagutti, Fondazione Onlus "Villa Mons. Damiano Zani", Fondazione Onlus Angelo  
46 Maj, Fondazione Onlus Giovannina Rizzieri, for some of the research on which this article is based.  
47  
48  
49  
50  
51  
52  
53  
54  
55  
56  
57  
58  
59  
60

## Bibliography

- 1 Andrews GJ, Evans J, Wiles JL. Re-spacing and re-placing gerontology: Relationality and affect. *Ageing Soc* Published Online First: 2013. doi:10.1017/S0144686X12000621
- 2 Gill Valentine. *Social Geographies: Space and Society*. Harlow: : Routledge 2001.
- 3 Wiles J. Conceptualizing place in the care of older people: The contributions of geographical gerontology. *J. Clin. Nurs.* 2005. doi:10.1111/j.1365-2702.2005.01281.x
- 4 Kadam UT, Croft PR. Clinical multimorbidity and physical function in older adults: A record and health status linkage study in general practice. *Fam Pract* 2007;**24**:412–9. doi:10.1093/fampra/cmm049
- 5 Molinari E, Spatola C, Pietrabissa G, *et al.* The Role of Psychogeriatrics in Healthy Living and Active Ageing. *Stud Health Technol Inform* 2014;**203**:122–33. doi:10.3233/978-1-61499-425-1-122
- 6 Van Malderen L, Mets T, De Vriendt P, *et al.* The Active Ageing-concept translated to the residential long-term care. *Qual Life Res* 2013;**22**:929–37. doi:10.1007/s11136-012-0216-5
- 7 Small N, Bower P, Chew-Graham CA, *et al.* Patient empowerment in long-term conditions: development and preliminary testing of a new measure. 2013. doi:10.1186/1472-6963-13-263
- 8 Alwan A, Armstrong T, Bettcher D, *et al.* The members of the core writing and coordination team were Contributions were also made. Geneva, Switzerland: 2000. [http://www.who.int/about/licensing/copyright\\_form/en/index.html](http://www.who.int/about/licensing/copyright_form/en/index.html) (accessed 8 May 2020).
- 9 Bronfenbrenner U. Toward an experimental ecology of human development. *Am Psychol* 1977;**32**:513–31. doi:10.1037/0003-066x.32.7.513
- 10 Bacsu J, Jeffery B, Abonyi S, *et al.* Healthy Aging in Place: Perceptions of Rural Older Adults. *Educ Gerontol* 2014;**40**:327–37. doi:10.1080/03601277.2013.802191
- 11 Phillipson C, Scharf T. Rural and urban perspectives on growing old: Developing a new research agenda. *Eur. J. Ageing.* 2005. doi:10.1007/s10433-005-0024-7
- 12 Clare Wenger G. Myths and realities of ageing in rural Britain. *Ageing Soc* Published Online First: 2001. doi:10.1017/S0144686X01008042
- 13 Havens B, Hall M, Sylvestre G, *et al.* Social Isolation and Loneliness: Differences between Older Rural and Urban Manitobans. *Can J Aging / La Rev Can du Vieil* Published Online First: 2004. doi:10.1353/cja.2004.0022
- 14 Kinsella K. Urban and rural dimensions of global population aging: An overview. In: *Journal of Rural Health.* 2001. doi:10.1111/j.1748-0361.2001.tb00280.x
- 15 Winterton R, Warburton J. Does place matter? Reviewing the experience of disadvantage for older people in rural Australia. *Rural Soc.* 2011. doi:10.5172/rsj.20.2.187
- 16 Vasunilashorn S, Steinman BA, Liebig PS, *et al.* Aging in Place: Evolution of a Research Topic Whose Time Has Come. *J Aging Res* 2012;**2012**. doi:10.1155/2012/120952
- 17 Scharlach A, Graham C, Lehning A. The “Village” Model: A Consumer-Driven Approach for Aging in Place Andrew. *Gerontologist* 2011;**52**:418–27. doi:10.1093/geront/gnr083
- 18 Guo KL, Castillo RJ. The U.S. Long Term Care System: Development and Expansion of Naturally Occurring Retirement Communities as an Innovative Model for Aging in Place. *Ageing Int* 2012;**37**:210–227. doi:10.1007/s12126-010-9105-9
- 19 Mynatt ED, Essa I, Rogers W. Increasing the Opportunities for Aging in Place. In: *Proceedings on the 2000 conference on Universal Usability.* Arlington: 2000. 65–71.
- 20 Mcdonough KE, Davitt JK. It Takes a Village: Community Practice, Social Work, and Aging-in-

- Place. *J Gerontol Soc Work* 2011;**54**:528–41. doi:10.1080/01634372.2011.581744
- 21 Davey J. ‘Ageing in Place’: The Views of Older Homeowners on Maintenance, Renovation and Adaptation. *Soc Policy J New Zeal* 2006.
- 22 Clark DO, Frankel RM, Morgan DL, *et al*. The meaning and significance of self-management among socioeconomically vulnerable older adults. *Journals Gerontol - Ser B Psychol Sci Soc Sci* 2008;**63**.
- 23 Wiles JL, Leibing A, Guberman N, *et al*. The Meaning of “Aging in Place” to Older People. *Gerontologist* 2011;**52**:357–66. doi:10.1093/geront/gnr098
- 24 Fabbricotti IN. Integrated care in Europe: description and comparison of integrated care in six EU countries. *Int J Integr Care* Published Online First: 2003. doi:10.5334/ijic.86
- 25 Leichsenring K. Developing integrated health and social care services for older persons in Europe. *Int J Integr Care* Published Online First: 2004. doi:10.5334/ijic.107
- 26 Satpathy L. *SMART HOUSING: TECHNOLOGY TO AID AGING IN PLACE-NEW OPPORTUNITIES AND CHALLENGES*. 2006.<http://sun.library.msstate.edu/ETD-db/theses/available/etd-06082006-012243/>
- 27 Blumenthal D, Chernof B, Fulmer T, *et al*. Caring for high-need, high-cost patients - An urgent priority. *N. Engl. J. Med.* 2016. doi:10.1056/NEJMp1608511
- 28 Noel MA, Kaluzynski TS, Templeton VH. Quality Dementia Care: Integrating Caregivers into a Chronic Disease Management Model. *J Appl Gerontol* Published Online First: 2017. doi:10.1177/0733464815589986
- 29 Boehmer KR, Egginton JS, Branda ME, *et al*. Missed opportunity? Caregiver participation in the clinical encounter. A videographic analysis. *Patient Educ Couns* Published Online First: 2014. doi:10.1016/j.pec.2014.05.016
- 30 Applebaum A. Isolated, invisible, and in-need: There should be no ‘I’ in caregiver HHS Public Access. *Palliat Support Care* 2015;**13**:415–6. doi:10.1017/S1478951515000413
- 31 Lilly MB, Laporte A, Coyte PC. Labor Market Work and Home Care’s Unpaid Caregivers: A Systematic Review of Labor Force Participation Rates, Predictors of Labor Market Withdrawal, and Hours of Work. *Milbank Q* 2007;**85**:641–90.
- 32 Aronson J, Neysmith SM. The Retreat of the State and Long-Term Care Provision: Implications for Frail Elderly People, Unpaid Family Carers and Paid Home Care Workers. *Stud Polit Econ* 2016;**53**:37–66. doi:10.1080/19187033.1997.11675315
- 33 Caldeira C, Bietz M, Vidauri M, *et al*. Senior care for aging in place: Balancing assistance and independence. In: *Proceedings of the ACM Conference on Computer Supported Cooperative Work, CSCW*. Association for Computing Machinery 2017. 1605–17. doi:10.1145/2998181.2998206
- 34 Wolff JL, Spillman BC, Freedman VA, *et al*. A national profile of family and unpaid caregivers who assist older adults with health care activities. *JAMA Intern Med* Published Online First: 2016. doi:10.1001/jamainternmed.2015.7664
- 35 Morelli N, Barelo S, Mayan M, *et al*. Supporting family caregiver engagement in the care of old persons living in hard to reach communities: A scoping review. *Heal Soc Care Community* 2019;**27**:1363–74. doi:10.1111/hsc.12826
- 36 Rodrigues R, Schulmann K, Schmidt A, *et al*. The indirect costs of long-term care. *Employment, Soc Aff Incl* 2013;**1**:1–42.<https://www.euro.centre.org/publications/detail/415>
- 37 Schulz R, Beach SR. Caregiving as a risk factor for mortality: The caregiver health effects study. *J Am Med Assoc* Published Online First: 1999. doi:10.1001/jama.282.23.2215
- 38 Hasselkus BR, Murray BJ. Everyday occupation, well-being, and identity: The experience of

- caregivers in families with dementia. *Am J Occup Ther* Published Online First: 2007. doi:10.5014/ajot.61.1.9
- 39 Beals KP, Wight RG, Aneshensel CS, *et al.* The role of family caregivers in HIV medication adherence. *AIDS Care* Published Online First: 2006. doi:10.1080/09540120500275627
- 40 Barello S, Castiglioni C, Bonanomi A, *et al.* The Caregiving Health Engagement Scale (CHE-s): Development and initial validation of a new questionnaire for measuring family caregiver engagement in healthcare. *BMC Public Health* 2019;**19**:1–16. doi:10.1186/s12889-019-7743-8
- 41 Barello S, Savarese M, Graffigna G. *The role of caregivers in the elderly healthcare journey: Insights for sustaining elderly patient engagement.* 2016. doi:10.1515/9783110452440-010
- 42 Provenzi L, Barello S, Fumagalli M, *et al.* A Comparison of Maternal and Paternal Experiences of Becoming Parents of a Very Preterm Infant. *JOGNN - J Obstet Gynecol Neonatal Nurs* 2016;**45**. doi:10.1016/j.jogn.2016.04.004
- 43 Provenzi L, Barello S, Graffigna G. Caregiver engagement in the neonatal intensive care unit: Parental needs, engagement milestones, and action priorities for neonatal healthcare of preterm infants. In: *Patient Engagement: A Consumer-Centered Model to Innovate Healthcare.* 2016. 94–107. doi:10.1515/9783110452440-009
- 44 Blakemore A, Hann M, Howells K, *et al.* Patient activation in older people with long-term conditions and multimorbidity: correlates and change in a cohort study in the United Kingdom. *BMC Health Serv Res* 2016;**16**:582. doi:10.1186/s12913-016-1843-2
- 45 McMullen CK, Schneider J, Altschuler A, *et al.* Caregivers as healthcare managers: health management activities, needs, and caregiving relationships for colorectal cancer survivors with ostomies. *Support Care Cancer* 2014;**22**:2401–8. doi:10.1007/s00520-014-2194-3
- 46 Goodman MS, Thompson VS, Thompson VS, *et al.* Community-based participatory research. In: *Public Health Research Methods for Partnerships and Practice.* 2018. doi:10.1201/9781315155722-1
- 47 Page-Reeves J. Community-Based Participatory Research for Health. *Health Promot Pract* Published Online First: 2019. doi:10.1177/1524839918809007
- 48 Istituto nazionale di statistica. Popolazione residente al 1° gennaio : Lombardia. 2019. <http://dati.istat.it/Index.aspx?QueryId=18548> (accessed 8 May 2020).
- 49 Aging NI on. What Is Long-Term Care? U.S. Dep. Heal. Hum. Serv. 2017. <https://www.nia.nih.gov/health/what-long-term-care> (accessed 8 May 2020).
- 50 Hinton L, Guo Z, Hillygus J, *et al.* Working with culture: A qualitative analysis of barriers to the recruitment of Chinese-American family caregivers for dementia research. 2000.
- 51 De Leeuw ED. Reducing Missing Data in Surveys: An Overview of Methods. *Qual Quant* 2001;**35**:147–60.
- 52 Nakash RA, Hutton JL, Jørstad-Stein EC, *et al.* Maximising response to postal questionnaires-A systematic review of randomised trials in health research. *BMC Med Res Methodol* 2006;**6**:1–9. doi:10.1186/1471-2288-6-5
- 53 Guerriere DN, Coyte PC. The Ambulatory and Home Care Record: A Methodological Framework for Economic Analyses in End-of-Life Care. *Res J Aging Res* 2011;**2011**:11. doi:10.4061/2011/374237
- 54 Yu M, Guerriere DN, Coyte PC. Societal costs of home and hospital end-of-life care for palliative care patients in Ontario, Canada. *Health Soc Care Community* 2015;**23**:605–18. doi:10.1111/hsc.12170
- 55 Arksey H, O'malley L. Scoping studies: towards a methodological framework. *Int J Soc Res Methodol* 2005;**8**:19–32. doi:10.1080/1364557032000119616

- 1  
2  
3  
4  
5  
6  
7  
8  
9  
10  
11 56 Roter DL, Hall JA, Merisca R, *et al*. Effectiveness of Interventions to Improve Patient Compliance a  
12 Meta-Analysis. *Med Care* 1998;**36**:1138–61. doi:10.1097/00005650-199808000-00004
- 13 57 Guest G, Namey E, Mckenna K. How Many Focus Groups Are Enough? Building an Evidence Base  
14 for Nonprobability Sample Sizes. *Field methods* 2017;**29**:3–22. doi:10.1177/1525822X16639015
- 15 58 Hsieh HF, Shannon SE. Three approaches to qualitative content analysis. *Qual Health Res*  
16 2005;**15**:1277–88. doi:10.1177/1049732305276687
- 17 59 Corrao S. *Il focus group: Laboratorio sociologico*. third. Franco Angeli 2005.  
18 <https://www.ibs.it/focus-group-libro-sabrina-corrao/e/9788846421883> (accessed 9 May 2020).
- 19 60 Yin RK. The Case Study as a Serious Research Strategy. *Sci Commun* 1981;**3**:97–114.  
20 doi:10.1177/107554708100300106
- 21 61 Thomas DR. A General Inductive Approach for Analyzing Qualitative Evaluation Data. *Am J Eval*  
22 2006;**27**:237–46. doi:10.1177/1098214005283748
- 23 62 Boyatzis RE. *Thematic Analysis and Code Development The Search for the Codable Moment*. Sage  
24 1998.  
25 [http://books.google.com/books?hl=en&lr=&id=\\_rfCIWRhIKAC&oi=fnd&pg=PR6&dq=narrative+thematic+analysis&ots](http://books.google.com/books?hl=en&lr=&id=_rfCIWRhIKAC&oi=fnd&pg=PR6&dq=narrative+thematic+analysis&ots=EyvHynfh_k&sig=qbJaepOG0MltWYP0mCHpRczCUus%5Cnhttp://books.google.com/books?hl=en&lr=&id=_rfCIWRhIKAC&oi=fnd&pg=PR6&dq=narrative+thematic+analysis&ots) (accessed 9 May 2020).
- 26 63 Strauss A, Corbin J. *Basics of Qualitative Research Techniques and Procedures for Developing Grounded Theory*. Thousand Oaks : Sage Publication 2015. doi:10.4135/9781452230153
- 27 64 Smebye KL, Kirkevold M, Engedal K. How do persons with dementia participate in decision making  
28 related to health and daily care? A multi-case study. *BMC Health Serv Res* 2012;**12**:1–12.  
29 doi:10.1186/1472-6963-12-241
- 30 65 Gioia DA, Price KN, Hamilton AL, *et al*. Forging an identity: An insider-outsider study of processes  
31 involved in the formation of organizational identity. *Adm Sci Q* 2010;**55**:1–46.  
32 doi:10.2189/asqu.2010.55.1.1
- 33 66 Saldaña J. *The Coding Manual for Qualitative Researchers*. Los Angeles, London: 2016.
- 34 67 Muurinen H. Service-user participation in developing social services: applying the experiment-driven  
35 approach. *Eur J Soc Work Serv* 2018;**22**:961–73. doi:10.1080/13691457.2018.1461071
- 36 68 Passera S, Kärkkäinen H, Maila R. When, how, why prototyping? A practical framework for service  
37 development. *XXIII ISPIM Conf* 2012;:16–9.
- 38 69 Bausea K, Radimerskya A, Iwanickia M, *et al*. Feasibility Studies in the Product Development  
39 Process. In: *Procedia 24th CIRP Design Conference*. 2014. 473–8.
- 40 70 Creswell JW, Plano Clark VL. *Designing and Conducting Mixed Methods Research*. 2nd editio.  
41 Thousand Oaks, CA : SAGE Publications 2011. <https://uk.sagepub.com/en-gb/eur/designing-and-conducting-mixed-methods-research/book241842> (accessed 9 May 2020).
- 42 71 Polit DF, Beck CT. Generalization in quantitative and qualitative research: Myths and strategies. *Int J Nurs Stud* 2010;**47**:1451–8. doi:10.1016/j.ijnurstu.2010.06.004
- 43 72 McConnell T, Best P, Davidson G, *et al*. Coproduction for feasibility and pilot randomised controlled  
44 trials: Learning outcomes for community partners, service users and the research team. *Res Involv Engagem* 2018;**4**:1–11. doi:10.1186/s40900-018-0116-0
- 45 73 Commins P. Poverty and Social Exclusion in Rural Areas: Characteristics, Processes and Research  
46 Issues. *Sociol Ruralis* 2004;**44**:60–75. doi:10.1111/j.1467-9523.2004.00262.x

1  
2  
3  
4  
5  
6  
7  
8  
9  
10  
11  
12  
13  
14  
15  
16  
17  
18  
19  
20  
21  
22  
23  
24  
25  
26  
27  
28  
29  
30  
31  
32  
33  
34  
35  
36  
37  
38  
39  
40  
41  
42  
43  
44  
45  
46  
47  
48  
49  
50  
51  
52  
53  
54  
55  
56  
57  
58  
59  
60

For peer review only



1  
2  
3  
4  
5  
6  
7  
8  
9  
10  
11  
12  
13  
14  
15  
16  
17  
18  
19  
20  
21  
22  
23  
24  
25  
26  
27  
28  
29  
30  
31  
32  
33  
34  
35  
36  
37  
38  
39  
40  
41  
42  
43  
44  
45  
46  
47  
48  
49  
50  
51  
52  
53  
54  
55  
56  
57  
58  
59  
60

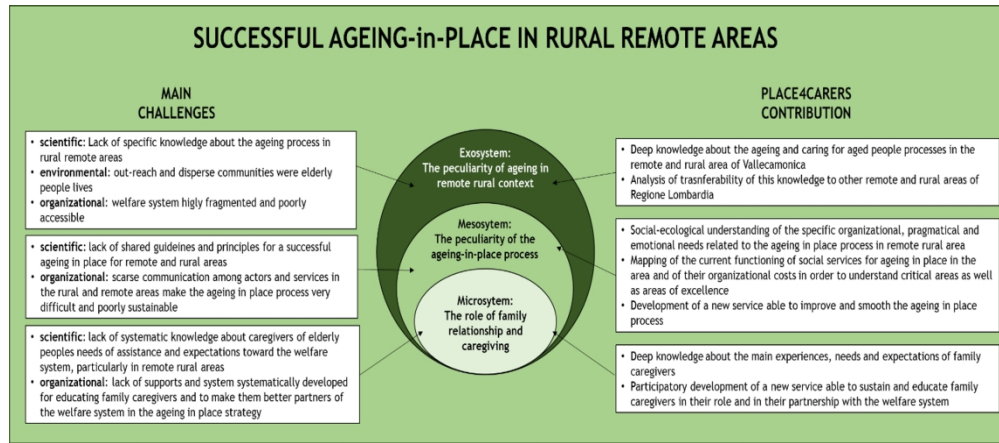

A three-fold perspective on successful "ageing-in-place" processes

847x372mm (150 x 150 DPI)

# BMJ Open

## PLACE4CARERS: A MIXED-METHOD STUDY PROTOCOL FOR ENGAGING FAMILY CAREGIVERS IN MEANINGFUL ACTIONS FOR SUCCESSFUL AGEING IN PLACE

|                                 |                                                                                                                                                                                                                                                                                                                                                                                                                                                                                                                                                                                                                                                                                                                                                                                                                                                                                                                                      |
|---------------------------------|--------------------------------------------------------------------------------------------------------------------------------------------------------------------------------------------------------------------------------------------------------------------------------------------------------------------------------------------------------------------------------------------------------------------------------------------------------------------------------------------------------------------------------------------------------------------------------------------------------------------------------------------------------------------------------------------------------------------------------------------------------------------------------------------------------------------------------------------------------------------------------------------------------------------------------------|
| Journal:                        | <i>BMJ Open</i>                                                                                                                                                                                                                                                                                                                                                                                                                                                                                                                                                                                                                                                                                                                                                                                                                                                                                                                      |
| Manuscript ID                   | bmjopen-2020-037570.R2                                                                                                                                                                                                                                                                                                                                                                                                                                                                                                                                                                                                                                                                                                                                                                                                                                                                                                               |
| Article Type:                   | Protocol                                                                                                                                                                                                                                                                                                                                                                                                                                                                                                                                                                                                                                                                                                                                                                                                                                                                                                                             |
| Date Submitted by the Author:   | 09-Jul-2020                                                                                                                                                                                                                                                                                                                                                                                                                                                                                                                                                                                                                                                                                                                                                                                                                                                                                                                          |
| Complete List of Authors:       | GRAFFIGNA, GUENDALINA; UNIVERSITA' CATTOLICA DEL SACRO CUORE, PSYCHOLOGY<br>Barello, Serena; Università Cattolica , Department of Psychology<br>Morelli, Niccolò; UNIVERSITA' CATTOLICA DEL SACRO CUORE, PSYCHOLOGY; Università di Bologna, Department of Sociology and Business Law<br>Gheduzzi, Eleonora; Politecnico di Milano, Department of Management Engineering<br>Corbo, Massimo; Casa Cura Policlinico (CCP), Department of Neurorehabilitation Sciences<br>Ginex, Valeria; Casa Cura Policlinico (CCP), Department of Neurorehabilitation Sciences; Fondazione NEED Institute<br>Ferrari, Roberta; Azienda Territoriale per i Servizi alla Persona Vallecamonica<br>Lascioli, Andrea; Azienda Territoriale per i Servizi alla Persona Vallecamonica<br>Feriti, Carolina; Azienda Territoriale per i Servizi alla Persona Vallecamonica<br>Masella, Cristina ; Politecnico di Milano, Department of Management Engineering |
| <b>Primary Subject Heading</b>: | Health services research                                                                                                                                                                                                                                                                                                                                                                                                                                                                                                                                                                                                                                                                                                                                                                                                                                                                                                             |
| Secondary Subject Heading:      | Sociology, Qualitative research, Public health, Patient-centred medicine                                                                                                                                                                                                                                                                                                                                                                                                                                                                                                                                                                                                                                                                                                                                                                                                                                                             |
| Keywords:                       | Organisation of health services < HEALTH SERVICES ADMINISTRATION & MANAGEMENT, QUALITATIVE RESEARCH, HEALTH SERVICES ADMINISTRATION & MANAGEMENT                                                                                                                                                                                                                                                                                                                                                                                                                                                                                                                                                                                                                                                                                                                                                                                     |
|                                 |                                                                                                                                                                                                                                                                                                                                                                                                                                                                                                                                                                                                                                                                                                                                                                                                                                                                                                                                      |

SCHOLARONE™  
Manuscripts



I, the Submitting Author has the right to grant and does grant on behalf of all authors of the Work (as defined in the below author licence), an exclusive licence and/or a non-exclusive licence for contributions from authors who are: i) UK Crown employees; ii) where BMJ has agreed a CC-BY licence shall apply, and/or iii) in accordance with the terms applicable for US Federal Government officers or employees acting as part of their official duties; on a worldwide, perpetual, irrevocable, royalty-free basis to BMJ Publishing Group Ltd ("BMJ") its licensees and where the relevant Journal is co-owned by BMJ to the co-owners of the Journal, to publish the Work in this journal and any other BMJ products and to exploit all rights, as set out in our [licence](#).

The Submitting Author accepts and understands that any supply made under these terms is made by BMJ to the Submitting Author unless you are acting as an employee on behalf of your employer or a postgraduate student of an affiliated institution which is paying any applicable article publishing charge ("APC") for Open Access articles. Where the Submitting Author wishes to make the Work available on an Open Access basis (and intends to pay the relevant APC), the terms of reuse of such Open Access shall be governed by a Creative Commons licence – details of these licences and which [Creative Commons](#) licence will apply to this Work are set out in our licence referred to above.

Other than as permitted in any relevant BMJ Author's Self Archiving Policies, I confirm this Work has not been accepted for publication elsewhere, is not being considered for publication elsewhere and does not duplicate material already published. I confirm all authors consent to publication of this Work and authorise the granting of this licence.

**PLACE4CARERS:****A MIXED-METHOD STUDY PROTOCOL FOR ENGAGING FAMILY CAREGIVERS IN MEANINGFUL ACTIONS FOR SUCCESSFUL AGEING IN PLACE**

Guendalina Graffigna<sup>1</sup>, Serena Barelo<sup>1</sup>, Niccolò Morelli<sup>1,2</sup>, Eleonora Gheduzzi<sup>3</sup>, Massimo Corbo<sup>4</sup>, Valeria Ginex<sup>4,5</sup>, Roberta Ferrari<sup>6</sup>, Andrea Lascioli<sup>6</sup>, Carolina Feriti<sup>6</sup>, Cristina Masella<sup>3</sup>

1. Department of Psychology, EngageMinds HUB Research Center, Università Cattolica del Sacro Cuore di Milano, Italy.
2. Department of Sociology and Business Law, Università di Bologna, Italy
3. Department of Management Engineering, Politecnico di Milano, Italy
4. Department of Neurorehabilitation Sciences, Casa Cura Policlinico (CCP), Milano, Italy
5. Fondazione NEED Institute, Milano, Italy
6. Azienda Territoriale per i Servizi alla Persona Vallecamonica, Breno, Italy

**Corresponding author at:**

Serena Barelo, PhD, PsyD  
Assistant Professor  
EngageMinds Hub – Consumer, Food & Health Research Center  
Department of Psychology  
Università Cattolica del Sacro Cuore, L.go Agostino Gemelli 1, 20143, Milano (Italy)  
Mail: serena.barelo@unicatt.it  
Phone : +39 02.7234.3863

1  
2  
3  
4  
5  
6  
7  
8  
9  
10  
11  
12  
13  
14  
15  
16  
17  
18  
19  
20  
21  
22  
23  
24  
25  
26  
27  
28  
29  
30  
31  
32  
33  
34  
35  
36  
37  
38  
39  
40  
41  
42  
43  
44  
45  
46  
47  
48  
49  
50  
51  
52  
53  
54  
55  
56  
57  
58  
59  
60

## Abstract

**Introduction.** Engaging family caregivers could be a critical asset to make the “ageing-in-place” imperative a reality. This is particularly evident in rural and remote areas, where caregivers can fill the gaps that exist due to the fragmentation of the welfare system. However, there is little knowledge about the expectations that family caregivers have towards healthcare services in rural and remote areas.

Place4Carers (P4C) project aims to co-produce an innovative organizational model of social and healthcare services for family caregivers of older citizens living in Vallecamonica (Italy). The project is expected to facilitate ageing-in-place for older citizens, thus helping caregivers in their daily care activities.

**Methods and analysis.** Place4Carers is a community-based participatory research project featuring 5 WPs. WP1 consisted of a survey of unmet needs of caregivers and older people receiving services in Vallecamonica. WP2 consisted of a scoping literature review to map services that provide interventions of support to caregivers living in remote areas and promote engagement. WP3 organizes co-creation workshops with caregivers to co-design, co-manage and co-assess ideas and proposals for shaping caregiver-oriented services and organizational models. WP3 enriches the results of WP1 (survey) and WP2 (scoping literature review) and aims to co-create new ideas for intervention support with and for caregivers in relation to the objectives, features and characteristics of a new service able to address the caregiver needs and expectations. WP4 tests the service ideas co-created in WP3 through piloting an intervention based on ideas co-created with caregivers. Finally, WP5 assesses the transferability of the intervention to other similar contexts.

**Ethics and dissemination.** The study has been approved by the Ethics Committees of the Department of Psychology of Università Cattolica del Sacro Cuore and Politecnico of Milan. Results will be disseminated through peer reviewed journals, scientific meetings and meetings with the general population.

**Keywords:** Caregiver engagement; Community based participatory research; service co-creation; ageing-in-place

### Strengths and limitation of this study

- ▶ This study aims to use participatory methods to co-design an accessible and sustainable service for family caregivers of older citizens.
- ▶ Participation in the planning, design and implementation of the service will include family caregivers, older citizens, researchers and representatives from the welfare system (as ATSP, the agency that provide home services to local community).
- ▶ To our knowledge this is the first co-produced study that uses participatory methods to enhance and sustain the role of family caregivers to make ‘ageing in place’ a sustainable reality in rural and remote areas.
- ▶ The methodology of this study implies a multi-stakeholder, multi-level and self-sustainable approach, which will have both short-term and long-term beneficial effects on the possibility to continue the service deployment even after the end of the project
- ▶ Further studies are warranted to validate in other context the implied methodology

## INTRODUCTION

### Rationale of the study

This study's rationale is based on the insight that successful ageing is a complex phenomenon that is intrinsically intertwined with the 'places' and spaces that people belong to [1]. Spaces are not only a physical backdrop to events, but also have social, psychological and symbolic meanings[2]. People may have quite different lived experiences, expectations and opinions related to a particular space. None of these aspects of space (social, physical and symbolic) is necessarily more 'real' or important than any other. Instead, they are interconnected and directly dependent on each other [3]. Ageing is a dynamic process that is largely influenced by physical, social and cultural spaces [4]. Literature [5–8] discusses the concept of space in the ageing process from a three-fold perspective of (i) ageing spaces as eco systems, (ii) ageing spaces as meso-systems and (iii) ageing spaces as micro-systems. These inter-relationships are particularly noticeable in rural and remote areas. The research setting is Vallecamonica, an outreach territory in Italy and local partner is ATSP the agency that provide home services to local community.

Vallecamonica is a mountainous territory in the northern part of the Lombardy Region. It is divided into 44 municipalities, all of which have been categorized as "peripheral" or "ultra-peripheral", due to a poor access to services, scarce infrastructures, limited economic prosperity and negative demographic trends. Residential areas in Vallecamonica are geographically dispersed, and the viability is not made easy by the configuration of the territory and the limited network of infrastructures and public transportation services. The population living in the area is characterized by an ageing index, computed as the ratio between the number of people aged 65 or more and those aged 14 or less, equal to 157,3 (the average for the Lombardy Region is 152,6; DGR X/5208). The high proportion of elderly people attests a situation of a multidimension frailty, with several social and health care needs. Against this widespread need, most of the municipalities are distant 20 to 40 km (or more) from the main hospital and health care structures (DGR X/5208). Unsurprisingly, the amount of social and assistance services required and provided to support the difficult access to services increases year after year.

By assuming a social-ecological framework of analysis [9] the Place4Carers project (P4C) will disentangle the role of spaces and of their interrelated dynamics in the ageing process.

1. *ageing space as ecosystem: the uniqueness of ageing in rural and remote areas.* In the Italian context, similarly to other European countries, the elderly are becoming a prominent feature of the population, especially in rural and remote areas [10]. Literature suggests that inequities in access to health care systems for older people in rural and remote populations are more frequent compared to access in urban areas,[11]. Ageing societies present a range of challenges for the health and aged care system, particularly in rural and remote areas where workforce shortage and lack of access to specialist services are confounding factors. It is interesting to note that scientific literature has less focused on ageing population in rural and remote areas, even if these areas have more elders than urban areas. [12]. For these reasons, we can say that research on ageing populations are urban biased. The need for health and social care related services in rural and remote areas has not been met by service provision delivered in urban contexts [11,13,14]. Research focusing on older persons living at the geographical and social peripheries, argue that in policy and economic debates the local experiences of older persons living in rural and remote communities have often been ignored [15,16]. The P4C project aims to address this gap.

2. *ageing space as mesosystem: opportunity and challenges of the "ageing-in-place" imperative.* "ageing-in-place" is a popular term in current ageing policy and is today recognized as a strategic priority for making the ageing process more sustainable for both individuals and societies [17–20]. "Ageing in place" is defined as "remaining living in the community, with some level of independence, rather than in residential care" [21]. Some research highlighted that people prefer to age in place [1] because it has been shown that this strategy enables effectively older persons to maintain independence, autonomy, and meaningful relations in terms of connection to social support, including friends and family [22,23]. Promoting the aging-in-place reduces the

1  
2  
3 economic expenditures of public institutions, impacting positively on governments, health and social care  
4 organizations, elders and their family [23]. The term “place” has several dimensions that are interrelated: a  
5 physical dimension that can be seen and touched like home or neighborhood, a social dimension involving  
6 relationships with people and the ways in which individuals remain connected to others, an emotional and  
7 psychological dimension, which has to do with a sense of belonging and attachment, and a cultural dimension,  
8 which has to do with older people’s values, beliefs, ethnicity, and symbolic meanings. Sustainable  
9 communities should offer affordable and holistic services and a continuum of care to effectively engage elderly  
10 and their family in effective and sustainable health and social care, enabling them to ageing in health in place.  
11 Several interventions and projects both at a national and international level aim to reduce the fragmentation of  
12 welfare services by putting citizens – and their needs - at the centre of service delivery. However, a study  
13 conducted in Europe [24] found that a fragmented system of services was unable to meet the holistic needs of  
14 ageing societies, because the integration between social and health services is complex, including problems in  
15 inter-disciplinary teamwork, financing, and legal aspects. Integration of health and social services is on the  
16 agenda of many ageing countries [25]. Furthermore, in rural and remote context, welfare and social system  
17 often results fragmented and poorly accessible, making the ageing in place a possible paradigm only with high  
18 care out-of-pocket costs for families that have to take care alone of their elders. Few interventions devoted to  
19 ageing in place are related to digital/telemedicine intervention, without regarding the social aspect of care [26].  
20  
21  
22

23  
24 *3. ageing space as microsystem: the role of family relationship and caregiving for elderly citizens.* Family  
25 caregiver engagement is indeed regarded as a key factor to improve the quality and the sustainability of care  
26 services for older people [27–32]. Several studies have shown that caregivers are the invisible backbone of  
27 social and health care settings, particularly in rural and remote areas, as they facilitate the integration especially  
28 in areas and communities with limited access to services[33]. Despite their unquestionable role in increasing  
29 the chance of ageing-in-place for the older people they take care of, the caregivers experience several  
30 criticalities such as burden, social isolation and depletion. In fact, caregivers attest a critical decrease on their  
31 quality of life [34], and they report health issues, such as tiredness, insomnia, depression, weight loss or gain,  
32 drug use and need for psychological support [35]; these issues are frequently reported by women, especially if  
33 older. The European Commission report on “The indirect cost of long term care” (2013) [36] reveals that  
34 situation of psycho-social distress is widespread for caregivers not only in Italy but also in other countries.  
35 This is especially the case for caregivers of older people [37] and for those who are required to dedicate a  
36 significant amount of time to caring activities [37]. Actually, the caregivers of older people often become the  
37 primary interlocutors for the health and social care services to take decisions over the patients’ therapies and  
38 long-term treatments [38].  
39

40 Moreover, caregivers support the compliance to treatments and therapies and they support the older persons in  
41 managing follow-ups and clinical exams [39]. Last, caregivers are often the primary sources of psychological  
42 support and empathy for the care receiver and for whom they represent the main reference. Against this  
43 background, research shows that family caregivers who are more engaged in the care journey of their loved  
44 one have more capability to deal with stressful situations such as caregiving and thus, have less anxiety and  
45 depression and better perceived health [40–43]. By feeling more empowered and engaged in the caregiving  
46 tasks, caregivers might also reach a better work-family balance.  
47

48 Appropriate engagement and tailored support of caregivers have the potential to improve their experiences and  
49 quality of life and facilitate shared decision making while enhancing the quality of care provided to older  
50 persons and reducing the use of unnecessary health and social services [44], as well as increasing the  
51 effectiveness of health and social care interventions [45]. Furthermore, supporting the role of informal carers  
52 (i.e. family and friends providing mostly unpaid care to frail seniors) is important to provide an adequate  
53 continuum of care between informal and formal care.  
54

55 Figure 1 describes the threefold social-ecological framework of analysis adopted by P4C.  
56  
57  
58

59 *[please, insert figure 1 around here]*  
60



## Aims

The project aims to achieve the following objectives:

1. to explore, understand and measure caregiver' needs in terms of education, welfare, assistance and social inclusion and in relation to the services planned by the local home care agency, which is responsible for the delivery of basic social services and social assistance towards fragile people in the territory of Vallecamonica;
2. to assess the cost (both economic and social) sustained by families when caring for their older relatives and to understand the critical aspects faced when accessing and using welfare services that are present in the territory;
3. to co-produce a new - better accessible and sustainable - service targeted to family caregivers of older citizens on the basis of the participative cooperation among family caregivers, older citizens, researchers and welfare system representatives;
4. to test the transferability of the new service concept in other and similar rural and remote territories of the Lombardy Region (Italy).

## METHODS AND ANALYSIS

### Methodological approach

The proposed study is designed according to a Community Based Participatory Research (CBPR) approach [46,47], to engage and to capture the perspectives of all the relevant stakeholders involved in the home based service of long term care. Thanks to its participatory nature, the P4C project will be not only the occasion to deepen the ageing and caregiving dynamics in the specific outreach territory of Vallecamonica. It will also be an innovative co-productive setting, where to engage older citizens, their caregivers and the welfare system to generate ideas for more accessible, effective and economically sustainable welfare services targeted to family caregivers.

This approach has the value to be grounded in the needs of communities and of the community-based organizations that serve them. It will allow community transformation and social change by directly engaging target stakeholders and stakeholders' knowledge in the research process and its outcomes. This is a partnership approach to research that equitably involves community members, organizational representatives, and researchers in all the phases of the research process. In this approach, all partners contribute expertise and ownership to reach shared decisions and to make the knowledge produced best rooted in the community experience and more able to be translated into the practice of services development.

In this project, we will mainly focus on the community of Vallecamonica, with 41 municipalities, and twelve hundred thousand inhabitants, 19% over 65 years old [48], to deepen the unique experiences and needs of family caregivers caring for elderly citizens located in that geographic area. Moreover, the involvement of the local home care agency (ATSP) will be a key asset in this project, in order to produce knowledge well integrated with situated interventions and policies and thus better able to generate social change and to improve the health and quality of life of community members. The ATSP is a public agency that coordinates third parties in delivering services to fragile persons as old people, families, disabled people with professional social service. Community members, professionals belonging to home care agency and the researchers will collaborate in all the phases of the project in order to improve its sustainability and its ability to set the ground not only for a better knowledge production process, but also for the translation of such knowledge into a real opportunity for policy, organizational and social change. We will also guarantee the continuous methodological and scientific supervision of an International Advisory Board in order to validate the research design and the tools used in the research. An important aspect of this study is to provide insight from all the stakeholders' perspectives by involving them in all the phase of the research process.

## Study Design

The Place4Carer Research Protocol is articulated in 5 work packages (WPs), as described in the next paragraphs.

### ***WP1 – Quantitative survey to define family caregivers needs, current services usage and sustained costs***

*Objectives.* This research module is conceived as an extensive assessment on the entire population of family caregivers of elderly people receiving services from the ATSP in Vallecamonica aimed to:

- Analyze, quantify and map experiences, unmet needs, preferences and expectations of support and assistance of family caregivers involved in elderly care, in general and in relation to the specific service offered by ATSP;
- Perform a service and costs analysis in order to map the actual use of available services by caregivers and the direct costs sustained by families for the elderly care and support;
- Identify caregivers to be involved in the participatory phases of the project, specifically those with significant caregiving difficulties.

*Tools and methods.* A quantitative descriptive survey was designed comprehending measures of caregivers' needs, levels of engagement and questions to gather information about the direct costs sustained by the families for providing assistance to the elderly (i.e. out of pocket payments both for the services received by the ATSP and for additional assistance services). The survey was administered by a psychologist at caregivers' homes. The WP1 started in march 2018 and finished in June 2018.

*Sampling.* Only family caregivers that had concrete difficulties in the daily care of their care receivers were involved in the survey. We focused on caregivers whose elders had activated home-based long-term care services from two to 12 months [49] and had been living in Vallecamonica. Based on this constraint, the research identified five the local providers that were offering this type of services in the valley and expressly consented to participate in the project (i.e. ATSP and four rest houses). In doing so, the selecting criteria were: family caregivers, whose elders have been living at home in Vallecamonica and assisted from 2 to 12 months by one of the five home-based long-term care service providers involved in the project.

The overall number of family caregivers eligible for the study was around 321. We asked the five service providers to explain the research and its objectives to all eligible family caregivers and to collect their interest in the project. Since caregivers do not usually have the time nor the interest in explaining their personal condition to unknown parties [50], the sample size of family caregivers that are both eligible and interested in the research was quite limited: 147 caregivers. To increase the response rate, a psychologist contacted by phone all the caregivers of the sample to organize with them face-to-face meetings for submitting the survey. Despite this approach required time and resources, it reduced the number of bias that may arise during the self-administration of the questionnaire. We expected that the large majority of family caregiver have medium-low health literacy and education. Thus, the presence and assistance of a psychologist supported them in understanding and filling the questionnaire correctly, by reducing the number of missing data [51]. Based on this approach, we reached a satisfactory response rate of 45% [52]. Caregivers involved in this WP1 are invited to participate in WP3 for the co-creation of a new service.

*Data Analysis.* Survey data were anonymized, stored in an electronic database and shared with the research partners. The data collected in the survey were analyzed with the aim of taking a clear picture of the population of the family caregivers in the area, in terms of psycho-social needs, level of engagement, out-of-pocket expenditures for caregiving activities (e.g. drugs, private professional assistance, transportation) [53] and cost of time loss for employment, calculated as the time used by the family caregiver in caring activity multiplied by the average cost of an Italian professional caregiver [54]. We designed the questionnaire by using tested scales and clear and familiar terms. The analysis of data was organized in four main steps. First, we performed a preliminary data analysis by computing descriptive statistics, such as mean, median, mode and standard deviation of all variables of the questionnaire. Second, we carried out a confirmatory factor analysis that aimed

1  
2  
3 at confirming the theoretical relationships between factors and their related variables of tested scales used in  
4 the questionnaire. Third, we investigated the correlation between psycho-social needs, level of engagement  
5 and economic expenditures. Finally, we performed a cluster analysis to identify sub-groups of caregivers that  
6 had similarities in terms of psycho-social needs, level of engagement and economic expenditures. Overall, this  
7 analysis helped us to understand the condition of caregivers by developing a taxonomy that cluster caregivers  
8 with similar needs, level of engagement and economic expenditures.  
9

## 10 11 12 ***WP2 – Analysis of the literature to map existing initiatives and services for caregiver engagement*** 13

14 *Objective.* The aim of WP2 was to map the good practices described in the literature related to support and  
15 engage family caregivers of elderly people in rural and remote settings. The WP2 started in May 2018, mapping  
16 interventions published in scientific articles and finished in February 2019 with the acceptance of the scoping  
17 review in a scientific journal.  
18

19 *Tools and Methods.* WP2 adopted a scoping review approach as set out by Arksey and O'Malley (2005)[55].  
20 We explored the conceptualization of ageing and of intervention mechanisms adopted to promote caregiver's  
21 engagement which oriented such interventions. The following search-terms have been adopted: [(caregivers  
22 OR family member\*) AND ( ageing OR elderly\* OR old\*) OR (patient\*) AND (support OR intervention OR  
23 program OR education OR counselling) AND (rural\* OR mountain\* OR "hard to reach"\*)]. The terms  
24 caregivers and family members was adopted in order to differentiate from professional, paid caregivers. The  
25 terms patients or older people were included to indicate the care receiver. Moreover, we included the terms  
26 support, intervention, program, education, counselling, in order to map a broader variety of initiatives. Finally,  
27 as our primary interest is on hard to reach areas, we included the terms rural, mountain and hard to reach. We  
28 originally included also the term remote, but the research did not give any new result, as the notion of remote  
29 context is still not explored in literature research. We checked also qualitatively the results of the search string,  
30 reading titles, abstracts and full text.  
31  
32

33 This scoping review was carried throughout the following scientific databases: Scopus, Psych-Info, Cinhal,  
34 Pubmed.  
35  
36  
37

38 *Data Analysis.* For the data analysis, we followed the Arksey & O' Malley approach[55]. All articles were  
39 merged in a unique Excel database in order to remove duplicates. Secondly, titles and abstracts were checked  
40 for the inclusion criteria, and in cases of ambiguity, also full texts were read in order to be sure for the inclusion.  
41 Moreover, the reference list were screened in order to identify additional material. Our inclusion criteria were  
42 related to data and language of publication, accessibility of full text and focus of intervention, type of  
43 caregivers, age of care-receivers and context of intervention. Articles should be published from 2012,  
44 recognized European Year of Active ageing, in English, and the full text must be accessible. We decided to  
45 start from 2012 as, considering that year as starting date, we identified 2545 articles, a consistent result. Among  
46 all the articles selected, no-one cited previously interventions. Moreover, articles must focus on interventions  
47 during the planning, piloting, implementation or analysis of the results. Finally, receivers of these interventions  
48 must be informal caregivers of family members. The care receivers, as mentioned before, should be over 60  
49 years old. On the other side, exclusion criteria were applied to articles that reflect on the necessity to provide  
50 intervention to caregivers, without providing a service, are not included. Finally, the geographical context of  
51 the provided service must be a hard to reach area, including rural and remote or mountain area. Articles were  
52 analyzed at two levels. (1) Intervention characteristics: objective of the intervention, characteristics of the  
53 receiver (by type of patient), context of intervention, presence or absence of technologies, individual or group  
54 setting, tools and duration of the intervention. More precisely, the retrieved studies were organized according  
55 to their main objective (i.e. psychosocial interventions, educational interventions, organizational  
56 interventions.) following the categorization of Roter et al (1998) [56]. (2) Study characteristics: country, study  
57  
58  
59  
60

1  
2  
3 design (randomized controlled trial “RCT”, controlled trial “CT”, cross-sectional “CS”, pilot “P”), sample and  
4 number of participants, outcome measures and results.  
5  
6  
7

### 8 **WP3 – Co-creation workshop with caregivers**

9  
10 *Objectives.* This work package of the protocol is dedicated to co-design, co-manage and co-assess (together  
11 with family caregivers, service providers and researchers) new ideas about a new service. The objectives and  
12 features of the new service should be able to address caregivers’ needs and expectations that emerged in WP1  
13 and take a cue from the good practices suggested by the results of the scoping literature review in WP2. This  
14 analysis is a unique opportunity for discussing with family caregivers on the challenges of the aging-in-place  
15 imperative in the context of rural and remote areas and co-designing, co-managing and co-assessment along  
16 all the phases of the project with them a possible solution. The WP3 started in July 2018 and is expected to  
17 finish by September 2020.  
18

19  
20 *Sampling.* Only family caregivers that highlighted their interest in the project during the WP1 are eligible to  
21 participate in the co-creation workshops. Thus, the selecting criteria are: family caregivers that participate in  
22 WP1 and whose elders have been living at home in Vallecamonica and assisted by one of the five home-based  
23 long-term care service’s providers. A psychologist is inviting caregivers by phone by calling them on random  
24 order to arrive to an average of 8-10 participants for each workshop. To increase the participation rate, we are  
25 trying to invite 10 to 12 caregivers at each workshop, knowing that logistical difficulties often lead us to some  
26 abandonment. Based on literature suggestions and the sample dimension, we expect to organize a minimum of  
27 3 to 6 co-creation workshops in the co-design, co-managing and co-assessment phases of the service cycle  
28 [57].  
29

30  
31 *Tools and methods.* We will carry out co-creation workshops in three main phases of the service life cycle, i.e.  
32 design, managing and assessment. Each workshop will last about 2 hours and will be conducted by two  
33 researchers specifically trained in qualitative research. To include different point of view and enrich the  
34 discussions, the workshops will involve both users (family caregivers) and service providers (ATSP). The  
35 workshops will be audio recorded.  
36

37 In the design phase of the service, we will involve family caregivers to identify their needs and to co-design  
38 new services for supporting them. Researchers will facilitate the co-design workshops using the following  
39 steps:

- 40 • Mutual acquaintance: presentation of the project, presentation of participants with their biographical  
41 info, and description of their role as informal caregiver;
- 42 • Focus on the needs: What are the difficulties of caregiving in the context of Vallecamonica, for them  
43 and for their elders;
- 44 • Insights, ideas for the new service : starting from emerged needs, what are the caregiver ideas for a  
45 new service, with a particular attention on information, educational and psycho-social help;
- 46 • Conclusions: caregivers, together with the moderator and members of the team of research, try to  
47 merge ideas for the new service in a unique project idea and to define it accurately.  
48

49 In the managing and assessment phases of the service, we will involve family caregivers to collect their  
50 opinions about the service’s activities. While the caregivers’ feedback in the managing phase are used to  
51 improve the service’s activities currently underway, in the assessment phase they will support researchers in  
52 assessing the service after its conclusion. Researchers will facilitate the co-managing and co-assessment  
53 workshops accomplishing the following steps:

- 54 • Mutual acquaintance: presentation of the results of ongoing service pilot, highlighting the number of  
55 activities, the participation and satisfaction rate of the caregivers involved;
- 56 • Opinions, feedback on the ongoing service: starting from service’s results, what are the caregiver  
57 suggestions for improving the ongoing service (i.e. co-managing phase) or for assessing the overall  
58 service results (i.e. co-assessment phase);  
59  
60

- Conclusions: caregivers, together with the moderator and members of the team of research, try to make practical suggestions for improving the new service both during its implementation and after its conclusion.

*Data Analysis.* All workshops will be transcribed and analyzed using content analysis [58,59] with an inductive approach [60]. Since we investigate a specific phenomenon (i.e. aging in place) by observing the behaviors of family caregivers, we prefer to adopt an open and flexible analysis of data [61]. We will start coding the transcripts by using an open coding approach and grouping relevant concepts in categories [62]. Then, we will investigate the relationships between categories and creating higher-order themes. The coding process will continue until all the relevant insights will be coded and data saturation will be reached [63]. To ensure the reliability of the analysis, two researchers will code the transcripts in parallel, analyzing and checking any inconsistency. Then, authors will discuss results and assemble the final set of categories in high-level themes that represent the main concepts of investigation [64]. Resulting themes and categories will be compared in term of similarities and differences with the results of WP1 and WP2 [65].

#### ***WP4 - Piloting and preliminary assessment***

*Objectives.* This WP is dedicated to the testing of the service ideas co-created in WP3 through a piloting action organized and delivered by ATSP. Specifically, the pilot study is aimed at:

- Assessing the feasibility and conditions for implementing the service in terms of effort and resources;
- Piloting the service;
- Evaluating the service.

The WP4 started in April 2019 and is expected to end by September 2020.

*Tools and methods.* To test service ideas and to ensure the iterative improvement of the pilot, we are using a service prototyping approach [66]. Among the several prototyping techniques, we have chosen “The Service Prototyping Practical Framework” that guides researchers in service prototyping process through six steps. First, the research team have stated clearly the purpose of the service. Second, the team have defined the most suitable and effective way to use the resources and skills for the service’s implementation [67]. To achieve this aim, we have performed a feasibility study for defining the capabilities and resources needed under legal, economic, operational, technical and scheduling point of view [68]. Third, the research team have chosen the most suitable technique for implementing the service, in line with team and users’ knowledge and competences. Fourth, the team will define the drivers that evaluate the service resolution and quality. We will assess the pilot through a set of quantitative metrics suggested by the existing literature. For each activity of the pilot, we will identify the most appropriate set of indicators. Since the number of participants in this rural and remote area might not be very significant, we will integrate this quantitative data with interviews. Mixing both quantitative and qualitative data in a single study will allow us to improve the understanding of future issues related to the implementation of the pilot [69]. We will collect the opinion of the providers of the pilot with individual interviews. Fifth, the project team will have to verify the validity of the service prototyping by using the results of the pilot’s assessment.

*Sample.* All the caregivers, whose elders are using at least one of the two type of homecare services identified in the WP1, are invited to participate to the pilot. We are spreading the project’s activities and meetings through both online and offline channels, to include all caregivers that wish to participate. ATSP is in charge of the pilot delivery.

1  
2  
3 *Data Analysis.* Once we will have collect the assessment's results and the users' opinions on the service, we  
4 will try to generalize results proposing a set of barriers and enablers that may have limited or facilitated the  
5 implementation of the pilot. We will start listing all possible barriers and enablers that will arise from the  
6 analysis of the pilot. Then, we will compare them in term of differences, similarities, frequency of occurrence  
7 and consistency. Finally, we will discuss the final list with the research team and other stakeholders involved  
8 in the project in order to check the reliability of results.  
9

### 10 ***WP5 Assessment of transferability to other regions and stakeholder involvement***

11  
12 *Objectives.* The transferability analysis, intends to make the insights and the idea of the new service better  
13 exportable to other similar extra-urban contexts. The transferability is assessed in Valtellina, which is an area  
14 geographically close to Vallecamonica and shares the same demographic challenges and similar difficulties in  
15 the access to assistance and services with the specific aim to:

- 16 • Investigate if the needs expressed by the family caregivers in mountainous and outreach communities  
17 are similar;
- 18 • Assess the transferability of the service ideas generated in WP 3;
- 19 • Engage stakeholders in the transferability, by adapting the service idea to the new specific context.

20 The WP5 started in December 2019 and is expected to end by December 2020.  
21

22  
23 *Tools and methods.* The module adopts a mixed methods design by using a qualitative study to integrate and  
24 deepen the previous quantitative one. In the first study, we will distribute an exploratory survey to the head of  
25 service providers in charge of social and welfare services for elders living in Valtellina. We will involve head  
26 of service providers because they know the territory and the needs of family caregivers, thus, they can give us  
27 an objective and valuable opinion on the P4C project and its implementation's effectiveness in Valtellina. The  
28 survey's aim is twofold. First, it checks the interests of the local districts in the project by investigating the  
29 correspondence with family caregivers' needs. Second, it intends to understand the future issues that may arise  
30 in adopting the project in the new context. Since we do not expect significant number of respondents, we will  
31 integrate survey's results by organizing focus groups with the providers of long-term household in the districts  
32 that express their interest in the study. The aim of this second qualitative study is to collect further insights  
33 about possible issues and barriers related to transferability of the project in that area. Based on surveys and  
34 focus groups' results, we will organize a feasibility study that will analyze legal, economic, operational,  
35 technical and scheduling constraints [70]. Even if in this project we will not deliver a new service in another  
36 territorial context, we want to develop the foundation for a transferability plan that could be done in another  
37 action research project.  
38  
39

40  
41 *Sample.* At the beginning, we will present the pilot's activities and results to the professionals in charge of  
42 social and welfare services of local districts in Valtellina, collecting their interests in the project. We will  
43 involve and contact the districts interested in the project to discuss a possible transferability of the service in  
44 their territory. For each district that will give us its availability, we will organize a focus group inviting the  
45 operators and staff that are managing and providing long-term household services for elders. The direct  
46 involvement and interaction with professionals and operators that might be in charge to create the service will  
47 allow us to collect insights for adopting the service in the new context.  
48  
49

50  
51 *Data Analysis.* Data from surveys and focus group will be triangulated with official and internal documentation  
52 related to the welfare systems in Valtellina [71]. Results of the assessment of transferability will be verified  
53 through interviews with key actors of the local districts of Valtellina for collecting their opinions and checking  
54 the reliability of results.  
55  
56

## 57 **PATIENT AND PUBLIC INVOLVEMENT**

58  
59 Citizens and members of the public institutions are involved in P4C at various stages of the study. We are  
60 holding information/ discussion sessions with key community stakeholders (caregivers, elderly citizens, public

1  
2  
3 institutions) to co-create the envisaged family caregiver services and recommendations across the spectrum of  
4 the project. This helps to create a positive and receptive environment for the ultimate implementation of the  
5 outputs of the project. The involvement in the research protocol of representatives belonging to both private  
6 and public institutions is allowing us to create synergic exchange between stakeholders having different points  
7 of view and resulting in alignment and cohesion of approach, without compromising independence of any  
8 party. In particular, the involvement of ATSP of Vallecamonica in the project is guaranteeing the access to the  
9 field and a more “ecological” insight on the ageing and caring dynamics in this territory. It is also guaranteeing  
10 the more concrete applicability of the ideas of services developed with the real commitment of the key welfare  
11 actors in the territory.  
12

13 This inclusion of patients/public in this way helps with enhanced recruitment and enables these participants to  
14 share their experiences of taking part with others and to underline the importance of the study to people like  
15 themselves. Finally, citizens and public representatives are actively involved in disseminating the results of  
16 the research.  
17  
18

## 19 **PROJECT IMPLICATIONS AND FUTURE POLICY**

21  
22 The P4C mission is to enhance and sustain the role of family caregiver in making the “ageing in place”  
23 imperative a sustainable reality in rural and remote areas. The results of the project will contribute to deliver  
24 more value to elderly citizens and health and social system, while making the welfare processes more efficient.  
25 Furthermore, by enhancing the skills and the psychological wellbeing of family caregivers of elderly citizens,  
26 the project will also contribute to improve quality of life and social inclusion of the care receiver. Existing  
27 knowledge on meaningful family caregiver engagement will be aligned, and sustainably implemented through  
28 involvement of relevant stakeholders. The P4C project will deliver a transformative network structure and  
29 instruments by creating the resources for making the current welfare system more responsive to the needs of  
30 elderly citizens and of their family caregivers. To serve this mission, the research is a multi-stakeholder, multi-  
31 level and self-sustained project, which will have both short-term and long-term beneficial effects, as outlined  
32 below. Furthermore, by the implementation of the sustainability strategy the long-term impact is that family  
33 caregiver engagement will be a common standard in the welfare ecosystem guided by commonly accepted  
34 practices. Moreover, the P4C protocol is expected to sensitize family caregiver about the available resources  
35 to be activated in the territory and how to make the healthcare/welfare process more fluid and less fragmented.  
36 This would also reduce the waste of health and social resources.  
37  
38

39  
40 Overall, all the stakeholders involved in the project may benefit from each other’s expertise and develop a  
41 better understanding of how diverse viewpoints can positively drive and impact on successful ageing processes.  
42 The impact of this is mutual trust and understanding nurtured by both the P4C results and the participation in  
43 the project. The study might have also some limitation. The impact of Place4Carers activities should be  
44 conceivable as local. However, since it includes actions and strategies in order to assess the generalizability of  
45 the insights produced to other extra-urban contexts in Lombardy, we are going to have some insights about  
46 results’ exportability.  
47  
48  
49

## 50 **ETHICS AND DISSEMINATION**

51  
52 The study was approved by the Ethics Committees of both Università Cattolica del Sacro Cuore and  
53 Politecnico di Milano. Informed consent will be collected from all participants. Data will be treated in  
54 anonymized form and only the P4C research team will have access to the data.  
55

56 The research team will provide a wide dissemination of the key achievements and recommendations to diverse  
57 stakeholders through various activities, thus supporting the impact of the project outcomes. Moreover,  
58 caregivers will be central to dissemination of the baseline information, which helped to motivate community  
59 involvement during and beyond the study.  
60

1  
2  
3 According to these premises, the aims of the dissemination activities will be: (1) to generate awareness about  
4 the concept and the main aims of the project; (2) to ensure strategic and extensive outreach to the ageing  
5 research community at large and engage with all other external relevant initiatives and projects to ensure  
6 optimal synergies and cross-fertilization and avoid duplication of efforts; (3) to identify opportunities to  
7 collaborate in developing a cohesive and coherent ecosystem to support possible next phases of the project, its  
8 adoption and its sustainability.  
9

## 10 11 12 **POTENTIAL LIMITATIONS** 13

14 The present protocol paper presents at least two possible limitations related to the target population chosen for  
15 this study. First, we expect a small sample size in WP1, WP3 and WP4, due to the peculiarity of the rural and  
16 remote context that limits the generalization of the research findings [72]. Second, the direct involvement in  
17 the design phase of the service may influence its level of innovativeness. Since the target population have  
18 medium-low level managerial or technological capabilities, we expect to identify low innovative service  
19 solution that may not involve any usage of technology. However, we believe that the investigation of the  
20 conditions of family caregivers in rural and remote areas is innovative 'per se' [12] and gives new insights  
21 regarding the opinions of this marginalized population that are usually excluded from the regional and national  
22 policies [73]. By explaining this protocol research, we would like to foster the investigation of marginalized  
23 population in rural and remote areas for reducing the social, economic and health discrepancies with the urban  
24 areas.  
25  
26  
27  
28

29 **Contributors** GG is the study principal investigator and contributed to develop the study design and to write  
30 the protocol. SB, NM, CM, EG, AL, MC, VG, CF, RF contributed to develop the study design and to write the  
31 protocol. All authors approved the final manuscript.  
32

33 **Funding** This project has been supported by a grant from Fondazione Cariplo, Italian private foundation (call  
34 'Ricerca sociale - 2017', rif. 2017-0955).  
35

36 **Competing interests** None declared.  
37

38 **Patient consent for publication** Not required.  
39

40 **Provenance and peer review** Not commissioned; externally peer reviewed.  
41

42 **Acknowledgement:** The authors would like to acknowledge the support of the four local nursing homes, i.e.  
43 Fondazione Onlus Ninj Beccagutti, Fondazione Onlus "Villa Mons. Damiano Zani", Fondazione Onlus Angelo  
44 Maj, Fondazione Onlus Giovannina Rizzieri, for some of the research on which this article is based.  
45  
46  
47  
48  
49  
50  
51  
52  
53  
54  
55  
56  
57  
58  
59  
60



## Bibliography

- 1 Andrews GJ, Evans J, Wiles JL. Re-spacing and re-placing gerontology: Relationality and affect. *Ageing Soc* Published Online First: 2013. doi:10.1017/S0144686X12000621
- 2 Gill Valentine. *Social Geographies: Space and Society*. Harlow: : Routledge 2001.
- 3 Wiles J. Conceptualizing place in the care of older people: The contributions of geographical gerontology. *J. Clin. Nurs.* 2005. doi:10.1111/j.1365-2702.2005.01281.x
- 4 Kadam UT, Croft PR. Clinical multimorbidity and physical function in older adults: A record and health status linkage study in general practice. *Fam Pract* 2007;**24**:412–9. doi:10.1093/fampra/cmm049
- 5 Molinari E, Spatola C, Pietrabissa G, *et al.* The Role of Psychogeriatrics in Healthy Living and Active Ageing. *Stud Health Technol Inform* 2014;**203**:122–33. doi:10.3233/978-1-61499-425-1-122
- 6 Van Malderen L, Mets T, De Vriendt P, *et al.* The Active Ageing-concept translated to the residential long-term care. *Qual Life Res* 2013;**22**:929–37. doi:10.1007/s11136-012-0216-5
- 7 Small N, Bower P, Chew-Graham CA, *et al.* Patient empowerment in long-term conditions: development and preliminary testing of a new measure. 2013. doi:10.1186/1472-6963-13-263
- 8 Alwan A, Armstrong T, Bettcher D, *et al.* The members of the core writing and coordination team were Contributions were also made. Geneva, Switzerland: 2000. [http://www.who.int/about/licensing/copyright\\_form/en/index.html](http://www.who.int/about/licensing/copyright_form/en/index.html) (accessed 8 May 2020).
- 9 Bronfenbrenner U. Toward an experimental ecology of human development. *Am Psychol* 1977;**32**:513–31. doi:10.1037/0003-066x.32.7.513
- 10 Bacsu J, Jeffery B, Abonyi S, *et al.* Healthy Aging in Place: Perceptions of Rural Older Adults. *Educ Gerontol* 2014;**40**:327–37. doi:10.1080/03601277.2013.802191
- 11 Phillipson C, Scharf T. Rural and urban perspectives on growing old: Developing a new research agenda. *Eur. J. Ageing.* 2005. doi:10.1007/s10433-005-0024-7
- 12 Clare Wenger G. Myths and realities of ageing in rural Britain. *Ageing Soc* Published Online First: 2001. doi:10.1017/S0144686X01008042
- 13 Havens B, Hall M, Sylvestre G, *et al.* Social Isolation and Loneliness: Differences between Older Rural and Urban Manitobans. *Can J Aging / La Rev Can du Vieil* Published Online First: 2004. doi:10.1353/cja.2004.0022
- 14 Kinsella K. Urban and rural dimensions of global population aging: An overview. In: *Journal of Rural Health.* 2001. doi:10.1111/j.1748-0361.2001.tb00280.x
- 15 Winterton R, Warburton J. Does place matter? Reviewing the experience of disadvantage for older people in rural Australia. *Rural Soc.* 2011. doi:10.5172/rsj.20.2.187
- 16 Vasunilashorn S, Steinman BA, Liebig PS, *et al.* Aging in Place: Evolution of a Research Topic Whose Time Has Come. *J Aging Res* 2012;**2012**. doi:10.1155/2012/120952
- 17 Scharlach A, Graham C, Lehning A. The “Village” Model: A Consumer-Driven Approach for Aging in Place Andrew. *Gerontologist* 2011;**52**:418–27. doi:10.1093/geront/gnr083
- 18 Guo KL, Castillo RJ. The U.S. Long Term Care System: Development and Expansion of Naturally Occurring Retirement Communities as an Innovative Model for Aging in Place. *Ageing Int* 2012;**37**:210–227. doi:10.1007/s12126-010-9105-9
- 19 Mynatt ED, Essa I, Rogers W. Increasing the Opportunities for Aging in Place. In: *Proceedings on the 2000 conference on Universal Usability.* Arlington: 2000. 65–71.
- 20 Mcdonough KE, Davitt JK. It Takes a Village: Community Practice, Social Work, and Aging-in-

- Place. *J Gerontol Soc Work* 2011;**54**:528–41. doi:10.1080/01634372.2011.581744
- 21 Davey J. ‘Ageing in Place’: The Views of Older Homeowners on Maintenance, Renovation and Adaptation. *Soc Policy J New Zeal* 2006.
- 22 Clark DO, Frankel RM, Morgan DL, *et al.* The meaning and significance of self-management among socioeconomically vulnerable older adults. *Journals Gerontol - Ser B Psychol Sci Soc Sci* 2008;**63**.
- 23 Wiles JL, Leibing A, Guberman N, *et al.* The Meaning of “Aging in Place” to Older People. *Gerontologist* 2011;**52**:357–66. doi:10.1093/geront/gnr098
- 24 Fabbriotti IN. Integrated care in Europe: description and comparison of integrated care in six EU countries. *Int J Integr Care* Published Online First: 2003. doi:10.5334/ijic.86
- 25 Leichsenring K. Developing integrated health and social care services for older persons in Europe. *Int J Integr Care* Published Online First: 2004. doi:10.5334/ijic.107
- 26 Satpathy L. *SMART HOUSING: TECHNOLOGY TO AID AGING IN PLACE-NEW OPPORTUNITIES AND CHALLENGES*. 2006.<http://sun.library.msstate.edu/ETD-db/theses/available/etd-06082006-012243/>
- 27 Blumenthal D, Chernof B, Fulmer T, *et al.* Caring for high-need, high-cost patients - An urgent priority. *N. Engl. J. Med.* 2016. doi:10.1056/NEJMp1608511
- 28 Noel MA, Kaluzynski TS, Templeton VH. Quality Dementia Care: Integrating Caregivers into a Chronic Disease Management Model. *J Appl Gerontol* Published Online First: 2017. doi:10.1177/0733464815589986
- 29 Boehmer KR, Egginton JS, Branda ME, *et al.* Missed opportunity? Caregiver participation in the clinical encounter. A videographic analysis. *Patient Educ Couns* Published Online First: 2014. doi:10.1016/j.pec.2014.05.016
- 30 Applebaum A. Isolated, invisible, and in-need: There should be no ‘I’ in caregiver HHS Public Access. *Palliat Support Care* 2015;**13**:415–6. doi:10.1017/S1478951515000413
- 31 Lilly MB, Laporte A, Coyte PC. Labor Market Work and Home Care’s Unpaid Caregivers: A Systematic Review of Labor Force Participation Rates, Predictors of Labor Market Withdrawal, and Hours of Work. *Milbank Q* 2007;**85**:641–90.
- 32 Aronson J, Neysmith SM. The Retreat of the State and Long-Term Care Provision: Implications for Frail Elderly People, Unpaid Family Carers and Paid Home Care Workers. *Stud Polit Econ* 2016;**53**:37–66. doi:10.1080/19187033.1997.11675315
- 33 Caldeira C, Bietz M, Vidauri M, *et al.* Senior care for aging in place: Balancing assistance and independence. In: *Proceedings of the ACM Conference on Computer Supported Cooperative Work, CSCW*. Association for Computing Machinery 2017. 1605–17. doi:10.1145/2998181.2998206
- 34 Wolff JL, Spillman BC, Freedman VA, *et al.* A national profile of family and unpaid caregivers who assist older adults with health care activities. *JAMA Intern Med* Published Online First: 2016. doi:10.1001/jamainternmed.2015.7664
- 35 Morelli N, Barello S, Mayan M, *et al.* Supporting family caregiver engagement in the care of old persons living in hard to reach communities: A scoping review. *Heal Soc Care Community* 2019;**27**:1363–74. doi:10.1111/hsc.12826
- 36 Rodrigues R, Schulmann K, Schmidt A, *et al.* The indirect costs of long-term care. *Employment, Soc Aff Incl* 2013;:1–42.<https://www.euro.centre.org/publications/detail/415>
- 37 Schulz R, Beach SR. Caregiving as a risk factor for mortality: The caregiver health effects study. *J Am Med Assoc* Published Online First: 1999. doi:10.1001/jama.282.23.2215
- 38 Hasselkus BR, Murray BJ. Everyday occupation, well-being, and identity: The experience of

1  
2  
3  
4  
5  
6  
7  
8  
9  
10  
11  
12  
13  
14  
15  
16  
17  
18  
19  
20  
21  
22  
23  
24  
25  
26  
27  
28  
29  
30  
31  
32  
33  
34  
35  
36  
37  
38  
39  
40  
41  
42  
43  
44  
45  
46  
47  
48  
49  
50  
51  
52  
53  
54  
55  
56  
57  
58  
59  
60

caregivers in families with dementia. *Am J Occup Ther* Published Online First: 2007. doi:10.5014/ajot.61.1.9

- 39 Beals KP, Wight RG, Aneshensel CS, *et al.* The role of family caregivers in HIV medication adherence. *AIDS Care* Published Online First: 2006. doi:10.1080/09540120500275627
- 40 Barello S, Castiglioni C, Bonanomi A, *et al.* The Caregiving Health Engagement Scale (CHE-s): Development and initial validation of a new questionnaire for measuring family caregiver engagement in healthcare. *BMC Public Health* 2019;**19**:1–16. doi:10.1186/s12889-019-7743-8
- 41 Barello S, Savarese M, Graffigna G. *The role of caregivers in the elderly healthcare journey: Insights for sustaining elderly patient engagement.* 2016. doi:10.1515/9783110452440-010
- 42 Provenzi L, Barello S, Fumagalli M, *et al.* A Comparison of Maternal and Paternal Experiences of Becoming Parents of a Very Preterm Infant. *JOGNN - J Obstet Gynecol Neonatal Nurs* 2016;**45**. doi:10.1016/j.jogn.2016.04.004
- 43 Provenzi L, Barello S, Graffigna G. Caregiver engagement in the neonatal intensive care unit: Parental needs, engagement milestones, and action priorities for neonatal healthcare of preterm infants. In: *Patient Engagement: A Consumer-Centered Model to Innovate Healthcare.* 2016. 94–107. doi:10.1515/9783110452440-009
- 44 Blakemore A, Hann M, Howells K, *et al.* Patient activation in older people with long-term conditions and multimorbidity: correlates and change in a cohort study in the United Kingdom. *BMC Health Serv Res* 2016;**16**:582. doi:10.1186/s12913-016-1843-2
- 45 McMullen CK, Schneider J, Altschuler A, *et al.* Caregivers as healthcare managers: health management activities, needs, and caregiving relationships for colorectal cancer survivors with ostomies. *Support Care Cancer* 2014;**22**:2401–8. doi:10.1007/s00520-014-2194-3
- 46 Goodman MS, Thompson VS, Thompson VS, *et al.* Community-based participatory research. In: *Public Health Research Methods for Partnerships and Practice.* 2018. doi:10.1201/9781315155722-1
- 47 Page-Reeves J. Community-Based Participatory Research for Health. *Health Promot Pract* Published Online First: 2019. doi:10.1177/1524839918809007
- 48 Istituto nazionale di statistica. Popolazione residente al 1° gennaio : Lombardia. 2019.<http://dati.istat.it/Index.aspx?QueryId=18548> (accessed 8 May 2020).
- 49 Aging NI on. What Is Long-Term Care? U.S. Dep. Heal. Hum. Serv. 2017.<https://www.nia.nih.gov/health/what-long-term-care> (accessed 8 May 2020).
- 50 Hinton L, Guo Z, Hillygus J, *et al.* Working with culture: A qualitative analysis of barriers to the recruitment of Chinese-American family caregivers for dementia research. 2000.
- 51 De Leeuw ED. Reducing Missing Data in Surveys: An Overview of Methods. *Qual Quant* 2001;**35**:147–60.
- 52 Nakash RA, Hutton JL, Jørstad-Stein EC, *et al.* Maximising response to postal questionnaires-A systematic review of randomised trials in health research. *BMC Med Res Methodol* 2006;**6**:1–9. doi:10.1186/1471-2288-6-5
- 53 Guerriere DN, Coyte PC. The Ambulatory and Home Care Record: A Methodological Framework for Economic Analyses in End-of-Life Care. *Res J Aging Res* 2011;**2011**:11. doi:10.4061/2011/374237
- 54 Yu M, Guerriere DN, Coyte PC. Societal costs of home and hospital end-of-life care for palliative care patients in Ontario, Canada. *Health Soc Care Community* 2015;**23**:605–18. doi:10.1111/hsc.12170
- 55 Arksey H, O'malley L. Scoping studies: towards a methodological framework. *Int J Soc Res Methodol* 2005;**8**:19–32. doi:10.1080/1364557032000119616

- 1  
2  
3 56 Roter DL, Hall JA, Merisca R, *et al.* Effectiveness of Interventions to Improve Patient Compliance a  
4 Meta-Analysis. *Med Care* 1998;**36**:1138–61. doi:10.1097/00005650-199808000-00004  
5  
6 57 Guest G, Namey E, Mckenna K. How Many Focus Groups Are Enough? Building an Evidence Base  
7 for Nonprobability Sample Sizes. *Field methods* 2017;**29**:3–22. doi:10.1177/1525822X16639015  
8  
9 58 Hsieh HF, Shannon SE. Three approaches to qualitative content analysis. *Qual Health Res*  
10 2005;**15**:1277–88. doi:10.1177/1049732305276687  
11  
12 59 Corrao S. *Il focus group: Laboratorio sociologico*. third. Franco Angeli 2005.  
13 <https://www.ibs.it/focus-group-libro-sabrina-corrao/e/9788846421883> (accessed 9 May 2020).  
14  
15 60 Yin RK. The Case Study as a Serious Research Strategy. *Sci Commun* 1981;**3**:97–114.  
16 doi:10.1177/107554708100300106  
17  
18 61 Thomas DR. A General Inductive Approach for Analyzing Qualitative Evaluation Data. *Am J Eval*  
19 2006;**27**:237–46. doi:10.1177/1098214005283748  
20  
21 62 Boyatzis RE. *Thematic Analysis and Code Development The Search for the Codable Moment*. Sage  
22 1998.  
23 [http://books.google.com/books?hl=en&lr=&id=\\_rfCIWRhIKAC&oi=fnd&pg=PR6&dq=narrative+thematic+analysis&ots=EyvHynfh\\_k&sig=qbJaepOG0MltWYP0mCHpRczCUus%5Chttp://books.google.com/books?hl=en&lr=&id=\\_rfCIWRhIKAC&oi=fnd&pg=PR6&dq=narrative+thematic+analysis&ots](http://books.google.com/books?hl=en&lr=&id=_rfCIWRhIKAC&oi=fnd&pg=PR6&dq=narrative+thematic+analysis&ots=EyvHynfh_k&sig=qbJaepOG0MltWYP0mCHpRczCUus%5Chttp://books.google.com/books?hl=en&lr=&id=_rfCIWRhIKAC&oi=fnd&pg=PR6&dq=narrative+thematic+analysis&ots) (accessed 9 May 2020).  
24  
25  
26  
27 63 Strauss A, Corbin J. *Basics of Qualitative Research Techniques and Procedures for Developing Grounded Theory*. Thousand Oaks: : Sage Publication 2015. doi:10.4135/9781452230153  
28  
29 64 Smebye KL, Kirkevold M, Engedal K. How do persons with dementia participate in decision making  
30 related to health and daily care? A multi-case study. *BMC Health Serv Res* 2012;**12**:1–12.  
31 doi:10.1186/1472-6963-12-241  
32  
33 65 Gioia DA, Price KN, Hamilton AL, *et al.* Forging an identity: An insider-outsider study of processes  
34 involved in the formation of organizational identity. *Adm Sci Q* 2010;**55**:1–46.  
35 doi:10.2189/asqu.2010.55.1.1  
36  
37 66 Saldaña J. *The Coding Manual for Qualitative Researchers*. Los Angeles, London: 2016.  
38  
39 67 Muurinen H. Service-user participation in developing social services: applying the experiment-driven  
40 approach. *Eur J Soc Work Serv* 2018;**22**:961–73. doi:10.1080/13691457.2018.1461071  
41  
42 68 Passera S, Kärkkäinen H, Maila R. When, how, why prototyping? A practical framework for service  
43 development. *XXIII ISPIM Conf* 2012;:16–9.  
44  
45 69 Bausea K, Radimerskya A, Iwanickia M, *et al.* Feasibility Studies in the Product Development  
46 Process. In: *Procedia 24th CIRP Design Conference*. 2014. 473–8.  
47  
48 70 Creswell JW, Plano Clark VL. *Designing and Conducting Mixed Methods Research*. 2nd editio.  
49 Thousand Oaks, CA: : SAGE Publications 2011. <https://uk.sagepub.com/en-gb/eur/designing-and-conducting-mixed-methods-research/book241842> (accessed 9 May 2020).  
50  
51 71 Polit DF, Beck CT. Generalization in quantitative and qualitative research: Myths and strategies. *Int J Nurs Stud* 2010;**47**:1451–8. doi:10.1016/j.ijnurstu.2010.06.004  
52  
53 72 McConnell T, Best P, Davidson G, *et al.* Coproduction for feasibility and pilot randomised controlled  
54 trials: Learning outcomes for community partners, service users and the research team. *Res Involv Engagem* 2018;**4**:1–11. doi:10.1186/s40900-018-0116-0  
55  
56 73 Commins P. Poverty and Social Exclusion in Rural Areas: Characteristics, Processes and Research  
57 Issues. *Sociol Ruralis* 2004;**44**:60–75. doi:10.1111/j.1467-9523.2004.00262.x  
58  
59  
60

1  
2  
3  
4  
5  
6  
7  
8  
9  
10  
11  
12  
13  
14  
15  
16  
17  
18  
19  
20  
21  
22  
23  
24  
25  
26  
27  
28  
29  
30  
31  
32  
33  
34  
35  
36  
37  
38  
39  
40  
41  
42  
43  
44  
45  
46  
47  
48  
49  
50  
51  
52  
53  
54  
55  
56  
57  
58  
59  
60

For peer review only

1  
2  
3  
4  
5  
6  
7  
8  
9  
10  
11  
12  
13  
14  
15  
16  
17  
18  
19  
20  
21  
22  
23  
24  
25  
26  
27  
28  
29  
30  
31  
32  
33  
34  
35  
36  
37  
38  
39  
40  
41  
42  
43  
44  
45  
46  
47  
48  
49  
50  
51  
52  
53  
54  
55  
56  
57  
58  
59  
60

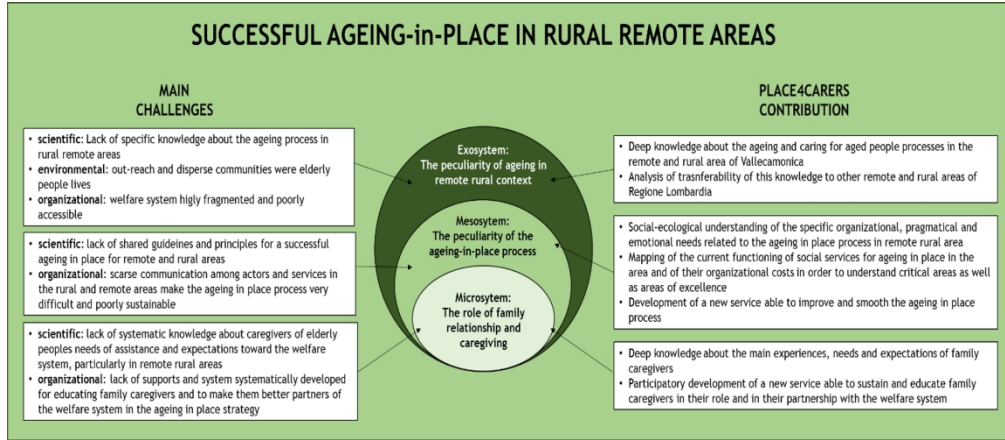

A three-fold perspective on successful "ageing-in-place" processes

847x372mm (150 x 150 DPI)
